# Supplementary material for: Yakima River Basin Water Column Respiration is a Minor Component of River Ecosystem Respiration
Source: Copernicus journal article supplement (doi:10.5194/egusphere-2023-3038), 2024-01-15
Supplement: Supplementary file 1 [file egusphere-2023-3038-supplement.pdf]

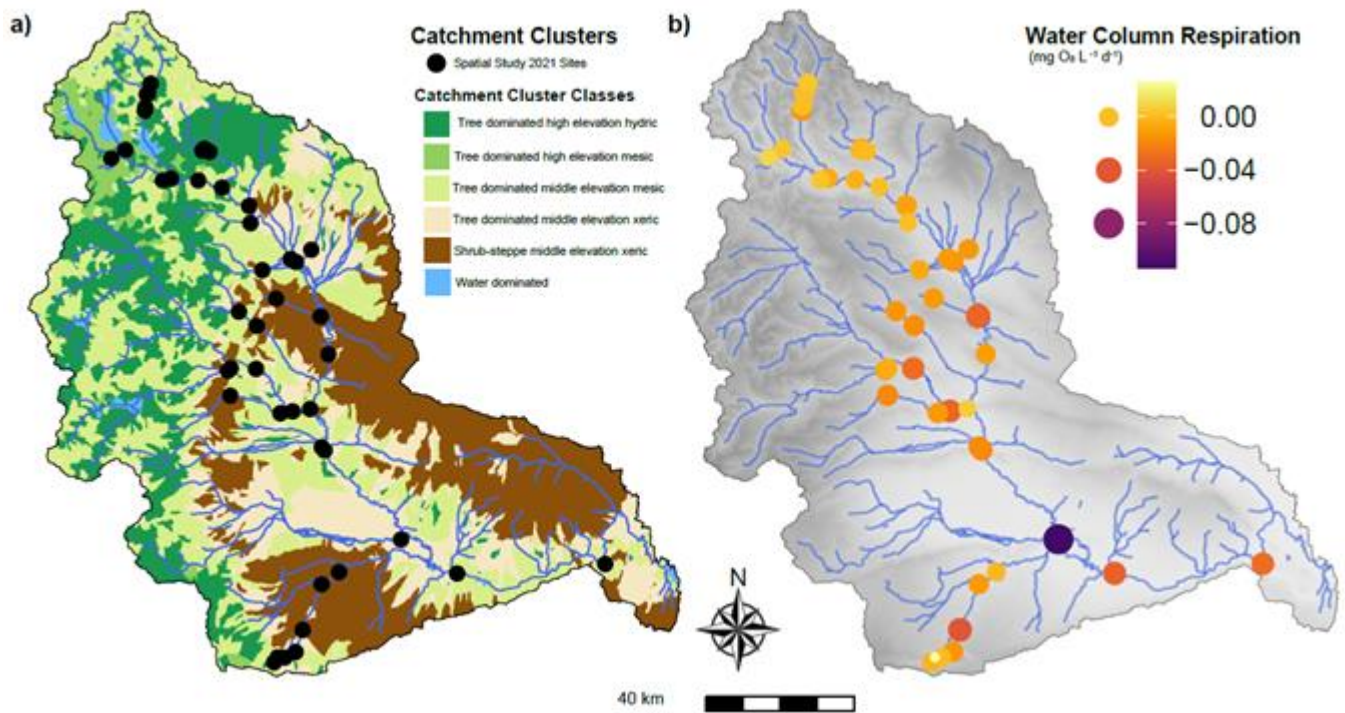

Figure S1. Field sites, Yakima River basin catchments sharing similar landscape characteristics and observed water column respiration rates across the Yakima River basin, Washington, USA. (a) Field sites from the 2021 spatial study superimposed on a map of catchment cluster analysis results. U. S. Geological Survey National Hydrography Dataset Plus Version 2.1 (NHDPlusV2.1) catchments were grouped into six classes sharing similar landscape characteristics using key biophysical and hydrologic variables and characterized according to tree height, precipitation, and elevation. Field sites located in cluster 1 are characterized as tree dominated high elevation mesic sites. Field sites located in cluster 3 are characterized as tree dominated, high elevation, hydric sites. Field sites located in cluster 4 are characterized as shrub-steppe, middle elevation, xeric sites. Field sites located in cluster 5 are characterized as tree dominated, middle elevation, mesic sites. Field sites located in cluster 6 are characterized as tree dominated, middle elevation, xeric sites. No sites were in cluster 2, which is characterized as water dominated. (b) Yakima River basin water column respiration rates (ERwc, mg O<sub>2</sub> L<sup>-1</sup> d<sup>-1</sup>) by site overlaid on a shaded hillslope map of the basin and the Yakima River and its tributaries. Map data from the National Hydrography Dataset Plus (NHDPlusV2.1) include catchment boundaries from the Watershed Boundary Dataset (WBD) and hydrography data from the National Hydrography Dataset (NHD) (U.S. Geological Survey, 2019).

15 **Table S1. Key climate, vegetation structure and function, topography, and wildfire potential variables and statistical moments used in the Columbia River basin catchment cluster analysis.**

| <b>Variable Name</b>                | <b>Description</b>                                                                                          |
|-------------------------------------|-------------------------------------------------------------------------------------------------------------|
| catchment_ID                        | Catchment ID number                                                                                         |
| AreaSqKM                            | Area of each catchment in sq km                                                                             |
| herb_cov_evc_MAX                    | LANDFIRE - Herbaceous Existing Vegetation Cover (maximum value per catchment)                               |
| herb_cov_evc_MEAN                   | LANDFIRE - Herbaceous Existing Vegetation Cover (mean value per catchment)                                  |
| herb_cov_evc_MIN                    | LANDFIRE - Herbaceous Existing Vegetation Cover (minimum value per catchment)                               |
| herb_cov_evc_STD                    | LANDFIRE - Herbaceous Existing Vegetation Cover (standard deviation per catchment)                          |
| herb_hgt_evh_MAX                    | LANDFIRE - Herbaceous Existing Vegetation Height (maximum value per catchment)                              |
| herb_hgt_evh_MEAN                   | LANDFIRE - Herbaceous Existing Vegetation Height (mean value per catchment)                                 |
| herb_hgt_evh_MIN                    | LANDFIRE - Herbaceous Existing Vegetation Height (minimum value per catchment)                              |
| herb_hgt_evh_STD                    | LANDFIRE - Herbaceous Existing Vegetation Height (standard deviation per catchment)                         |
| MCD15A3H_FPAR_1_MAX                 | MODIS - January Fraction of Photosynthetically Active Radiation (maximum value per catchment)               |
| MCD15A3H_FPAR_1_MEAN                | MODIS - January Fraction of Photosynthetically Active Radiation (mean value per catchment)                  |
| MCD15A3H_FPAR_1_MIN                 | MODIS - January Fraction of Photosynthetically Active Radiation (minimum value per catchment)               |
| MCD15A3H_FPAR_1_STD                 | MODIS - January Fraction of Photosynthetically Active Radiation (standard deviation per catchment)          |
| MCD15A3H_FPAR_10_MAX                | MODIS - October Fraction of Photosynthetically Active Radiation (maximum value per catchment)               |
| MCD15A3H_FPAR_10_MEAN               | MODIS - October Fraction of Photosynthetically Active Radiation (mean value per catchment)                  |
| MCD15A3H_FPAR_10_MIN                | MODIS - October Fraction of Photosynthetically Active Radiation (minimum value per catchment)               |
| MCD15A3H_FPAR_10_STD                | MODIS - October Fraction of Photosynthetically Active Radiation (standard deviation per catchment)          |
| MCD15A3H_FPAR_11_MAX                | MODIS - November Fraction of Photosynthetically Active Radiation (maximum value per catchment)              |
| MCD15A3H_FPAR_11_MEAN               | MODIS - November Fraction of Photosynthetically Active Radiation (mean value per catchment)                 |
| MCD15A3H_FPAR_11_MIN                | MODIS - November Fraction of Photosynthetically Active Radiation (minimum value per catchment)              |
| MCD15A3H_FPAR_11_STD                | MODIS - November Fraction of Photosynthetically Active Radiation (standard deviation per catchment)         |
| MCD15A3H_FPAR_12_MAX                | MODIS - December Fraction of Photosynthetically Active Radiation (maximum value per catchment)              |
| MCD15A3H_FPAR_12_MEAN               | MODIS - December Fraction of Photosynthetically Active Radiation (mean value per catchment)                 |
| MCD15A3H_FPAR_12_MIN                | MODIS - December Fraction of Photosynthetically Active Radiation (minimum value per catchment)              |
| MCD15A3H_FPAR_12_STD                | MODIS - December Fraction of Photosynthetically Active Radiation (standard deviation per catchment)         |
| MCD15A3H_FPAR_2_MAX                 | MODIS - February Fraction of Photosynthetically Active Radiation (maximum value per catchment)              |
| MCD15A3H_FPAR_2_MEAN                | MODIS - February Fraction of Photosynthetically Active Radiation (mean value per catchment)                 |
| MCD15A3H_FPAR_2_MIN                 | MODIS - February Fraction of Photosynthetically Active Radiation (minimum value per catchment)              |
| MCD15A3H_FPAR_2_STD                 | MODIS - February Fraction of Photosynthetically Active Radiation (standard deviation per catchment)         |
| MCD15A3H_FPAR_2009_2019_median_MAX  | MODIS - Long-Term Median Fraction of Photosynthetically Active Radiation (maximum value per catchment)      |
| MCD15A3H_FPAR_2009_2019_median_MEAN | MODIS - Long-Term Median Fraction of Photosynthetically Active Radiation (mean value per catchment)         |
| MCD15A3H_FPAR_2009_2019_median_MIN  | MODIS - Long-Term Median Fraction of Photosynthetically Active Radiation (minimum value per catchment)      |
| MCD15A3H_FPAR_2009_2019_median_STD  | MODIS - Long-Term Median Fraction of Photosynthetically Active Radiation (standard deviation per catchment) |
| MCD15A3H_FPAR_3_MAX                 | MODIS - March Fraction of Photosynthetically Active Radiation (maximum value per catchment)                 |

| <b>Variable Name</b> | <b>Description</b>                                                                                   |
|----------------------|------------------------------------------------------------------------------------------------------|
| MCD15A3H_FPAR_3_MEAN | MODIS - March Fraction of Photosynthetically Active Radiation (mean value per catchment)             |
| MCD15A3H_FPAR_3_MIN  | MODIS - March Fraction of Photosynthetically Active Radiation (minimum value per catchment)          |
| MCD15A3H_FPAR_3_STD  | MODIS - March Fraction of Photosynthetically Active Radiation (standard deviation per catchment)     |
| MCD15A3H_FPAR_4_MAX  | MODIS - April Fraction of Photosynthetically Active Radiation (maximum value per catchment)          |
| MCD15A3H_FPAR_4_MEAN | MODIS - April Fraction of Photosynthetically Active Radiation (mean value per catchment)             |
| MCD15A3H_FPAR_4_MIN  | MODIS - April Fraction of Photosynthetically Active Radiation (minimum value per catchment)          |
| MCD15A3H_FPAR_4_STD  | MODIS - April Fraction of Photosynthetically Active Radiation (standard deviation per catchment)     |
| MCD15A3H_FPAR_5_MAX  | MODIS - May Fraction of Photosynthetically Active Radiation (maximum value per catchment)            |
| MCD15A3H_FPAR_5_MEAN | MODIS - May Fraction of Photosynthetically Active Radiation (mean value per catchment)               |
| MCD15A3H_FPAR_5_MIN  | MODIS - May Fraction of Photosynthetically Active Radiation (minimum value per catchment)            |
| MCD15A3H_FPAR_5_STD  | MODIS - May Fraction of Photosynthetically Active Radiation (standard deviation per catchment)       |
| MCD15A3H_FPAR_6_MAX  | MODIS - June Fraction of Photosynthetically Active Radiation (maximum value per catchment)           |
| MCD15A3H_FPAR_6_MEAN | MODIS - June Fraction of Photosynthetically Active Radiation (mean value per catchment)              |
| MCD15A3H_FPAR_6_MIN  | MODIS - June Fraction of Photosynthetically Active Radiation (minimum value per catchment)           |
| MCD15A3H_FPAR_6_STD  | MODIS - June Fraction of Photosynthetically Active Radiation (standard deviation per catchment)      |
| MCD15A3H_FPAR_7_MAX  | MODIS - July Fraction of Photosynthetically Active Radiation (maximum value per catchment)           |
| MCD15A3H_FPAR_7_MEAN | MODIS - July Fraction of Photosynthetically Active Radiation (mean value per catchment)              |
| MCD15A3H_FPAR_7_MIN  | MODIS - July Fraction of Photosynthetically Active Radiation (minimum value per catchment)           |
| MCD15A3H_FPAR_7_STD  | MODIS - July Fraction of Photosynthetically Active Radiation (standard deviation per catchment)      |
| MCD15A3H_FPAR_8_MAX  | MODIS - August Fraction of Photosynthetically Active Radiation (maximum value per catchment)         |
| MCD15A3H_FPAR_8_MEAN | MODIS - August Fraction of Photosynthetically Active Radiation (mean value per catchment)            |
| MCD15A3H_FPAR_8_MIN  | MODIS - August Fraction of Photosynthetically Active Radiation (minimum value per catchment)         |
| MCD15A3H_FPAR_8_STD  | MODIS - August Fraction of Photosynthetically Active Radiation (standard deviation per catchment)    |
| MCD15A3H_FPAR_9_MAX  | MODIS - September Fraction of Photosynthetically Active Radiation (maximum value per catchment)      |
| MCD15A3H_FPAR_9_MEAN | MODIS - September Fraction of Photosynthetically Active Radiation (mean value per catchment)         |
| MCD15A3H_FPAR_9_MIN  | MODIS - September Fraction of Photosynthetically Active Radiation (minimum value per catchment)      |
| MCD15A3H_FPAR_9_STD  | MODIS - September Fraction of Photosynthetically Active Radiation (standard deviation per catchment) |
| MCD15A3H_LAI_1_MAX   | MODIS - January Leaf Area Index (maximum value per catchment)                                        |
| MCD15A3H_LAI_1_MEAN  | MODIS - January Leaf Area Index (mean value per catchment)                                           |
| MCD15A3H_LAI_1_MIN   | MODIS - January Leaf Area Index (minimum value per catchment)                                        |
| MCD15A3H_LAI_1_STD   | MODIS - January Leaf Area Index (standard deviation per catchment)                                   |
| MCD15A3H_LAI_10_MAX  | MODIS - October Leaf Area Index (maximum value per catchment)                                        |
| MCD15A3H_LAI_10_MEAN | MODIS - October Leaf Area Index (mean value per catchment)                                           |
| MCD15A3H_LAI_10_MIN  | MODIS - October Leaf Area Index (minimum value per catchment)                                        |
| MCD15A3H_LAI_10_STD  | MODIS - October Leaf Area Index (standard deviation per catchment)                                   |
| MCD15A3H_LAI_11_MAX  | MODIS - November Leaf Area Index (maximum value per catchment)                                       |
| MCD15A3H_LAI_11_MEAN | MODIS - November Leaf Area Index (mean value per catchment)                                          |

| <b>Variable Name</b>               | <b>Description</b>                                                          |
|------------------------------------|-----------------------------------------------------------------------------|
| MCD15A3H_LAI_11_MIN                | MODIS - November Leaf Area Index (minimum value per catchment)              |
| MCD15A3H_LAI_11_STD                | MODIS - November Leaf Area Index (standard deviation per catchment)         |
| MCD15A3H_LAI_12_MAX                | MODIS - December Leaf Area Index (maximum value per catchment)              |
| MCD15A3H_LAI_12_MEAN               | MODIS - December Leaf Area Index (mean value per catchment)                 |
| MCD15A3H_LAI_12_MIN                | MODIS - December Leaf Area Index (minimum value per catchment)              |
| MCD15A3H_LAI_12_STD                | MODIS - December Leaf Area Index (standard deviation per catchment)         |
| MCD15A3H_LAI_2_MAX                 | MODIS - February Leaf Area Index (maximum value per catchment)              |
| MCD15A3H_LAI_2_MEAN                | MODIS - February Leaf Area Index (mean value per catchment)                 |
| MCD15A3H_LAI_2_MIN                 | MODIS - February Leaf Area Index (minimum value per catchment)              |
| MCD15A3H_LAI_2_STD                 | MODIS - February Leaf Area Index (standard deviation per catchment)         |
| MCD15A3H_LAI_2009_2019_median_MAX  | MODIS - Long-Term Median Leaf Area Index (maximum value per catchment)      |
| MCD15A3H_LAI_2009_2019_median_MEAN | MODIS - Long-Term Median Leaf Area Index (mean value per catchment)         |
| MCD15A3H_LAI_2009_2019_median_MIN  | MODIS - Long-Term Median Leaf Area Index (minimum value per catchment)      |
| MCD15A3H_LAI_2009_2019_median_STD  | MODIS - Long-Term Median Leaf Area Index (standard deviation per catchment) |
| MCD15A3H_LAI_3_MAX                 | MODIS - March Leaf Area Index (maximum value per catchment)                 |
| MCD15A3H_LAI_3_MEAN                | MODIS - March Leaf Area Index (mean value per catchment)                    |
| MCD15A3H_LAI_3_MIN                 | MODIS - March Leaf Area Index (minimum value per catchment)                 |
| MCD15A3H_LAI_3_STD                 | MODIS - March Leaf Area Index (standard deviation per catchment)            |
| MCD15A3H_LAI_4_MAX                 | MODIS - April Leaf Area Index (maximum value per catchment)                 |
| MCD15A3H_LAI_4_MEAN                | MODIS - April Leaf Area Index (mean value per catchment)                    |
| MCD15A3H_LAI_4_MIN                 | MODIS - April Leaf Area Index (minimum value per catchment)                 |
| MCD15A3H_LAI_4_STD                 | MODIS - April Leaf Area Index (standard deviation per catchment)            |
| MCD15A3H_LAI_5_MAX                 | MODIS - May Leaf Area Index (maximum value per catchment)                   |
| MCD15A3H_LAI_5_MEAN                | MODIS - May Leaf Area Index (mean value per catchment)                      |
| MCD15A3H_LAI_5_MIN                 | MODIS - May Leaf Area Index (minimum value per catchment)                   |
| MCD15A3H_LAI_5_STD                 | MODIS - May Leaf Area Index (standard deviation per catchment)              |
| MCD15A3H_LAI_6_MAX                 | MODIS - June Leaf Area Index (maximum value per catchment)                  |
| MCD15A3H_LAI_6_MEAN                | MODIS - June Leaf Area Index (mean value per catchment)                     |
| MCD15A3H_LAI_6_MIN                 | MODIS - June Leaf Area Index (minimum value per catchment)                  |
| MCD15A3H_LAI_6_STD                 | MODIS - June Leaf Area Index (standard deviation per catchment)             |
| MCD15A3H_LAI_7_MAX                 | MODIS - July Leaf Area Index (maximum value per catchment)                  |
| MCD15A3H_LAI_7_MEAN                | MODIS - July Leaf Area Index (mean value per catchment)                     |
| MCD15A3H_LAI_7_MIN                 | MODIS - July Leaf Area Index (minimum value per catchment)                  |
| MCD15A3H_LAI_7_STD                 | MODIS - July Leaf Area Index (standard deviation per catchment)             |
| MCD15A3H_LAI_8_MAX                 | MODIS - August Leaf Area Index (maximum value per catchment)                |
| MCD15A3H_LAI_8_MEAN                | MODIS - August Leaf Area Index (mean value per catchment)                   |
| MCD15A3H_LAI_8_MIN                 | MODIS - August Leaf Area Index (minimum value per catchment)                |

| <b>Variable Name</b>             | <b>Description</b>                                                             |
|----------------------------------|--------------------------------------------------------------------------------|
| MCD15A3H_LAI_8_STD               | MODIS - August Leaf Area Index (standard deviation per catchment)              |
| MCD15A3H_LAI_9_MAX               | MODIS - September Leaf Area Index (maximum value per catchment)                |
| MCD15A3H_LAI_9_MEAN              | MODIS - September Leaf Area Index (mean value per catchment)                   |
| MCD15A3H_LAI_9_MIN               | MODIS - September Leaf Area Index (minimum value per catchment)                |
| MCD15A3H_LAI_9_STD               | MODIS - September Leaf Area Index (standard deviation per catchment)           |
| MOD16A2_ET_10_MAX                | MODIS - October Evapotranspiration (maximum value per catchment)               |
| MOD16A2_ET_10_MEAN               | MODIS - October Evapotranspiration (mean value per catchment)                  |
| MOD16A2_ET_10_MIN                | MODIS - October Evapotranspiration (minimum value per catchment)               |
| MOD16A2_ET_10_STD                | MODIS - October Evapotranspiration (standard deviation per catchment)          |
| MOD16A2_ET_11_MAX                | MODIS - November Evapotranspiration (maximum value per catchment)              |
| MOD16A2_ET_11_MEAN               | MODIS - November Evapotranspiration (mean value per catchment)                 |
| MOD16A2_ET_11_MIN                | MODIS - November Evapotranspiration (minimum value per catchment)              |
| MOD16A2_ET_11_STD                | MODIS - November Evapotranspiration (standard deviation per catchment)         |
| MOD16A2_ET_12_MAX                | MODIS - December Evapotranspiration (maximum value per catchment)              |
| MOD16A2_ET_12_MEAN               | MODIS - December Evapotranspiration (mean value per catchment)                 |
| MOD16A2_ET_12_MIN                | MODIS - December Evapotranspiration (minimum value per catchment)              |
| MOD16A2_ET_12_STD                | MODIS - December Evapotranspiration (standard deviation per catchment)         |
| MOD16A2_ET_2009_2019_median_MAX  | MODIS - Long-Term Median Evapotranspiration (maximum value per catchment)      |
| MOD16A2_ET_2009_2019_median_MEAN | MODIS - Long-Term Median Evapotranspiration (mean value per catchment)         |
| MOD16A2_ET_2009_2019_median_MIN  | MODIS - Long-Term Median Evapotranspiration (minimum value per catchment)      |
| MOD16A2_ET_2009_2019_median_STD  | MODIS - Long-Term Median Evapotranspiration (standard deviation per catchment) |
| MOD16A2ET_1_MAX                  | MODIS - January Evapotranspiration (maximum value per catchment)               |
| MOD16A2ET_1_MEAN                 | MODIS - January Evapotranspiration (mean value per catchment)                  |
| MOD16A2ET_1_MIN                  | MODIS - January Evapotranspiration (minimum value per catchment)               |
| MOD16A2ET_1_STD                  | MODIS - January Evapotranspiration (standard deviation per catchment)          |
| MOD16A2ET_2_MAX                  | MODIS - February Evapotranspiration (maximum value per catchment)              |
| MOD16A2ET_2_MEAN                 | MODIS - February Evapotranspiration (mean value per catchment)                 |
| MOD16A2ET_2_MIN                  | MODIS - February Evapotranspiration (minimum value per catchment)              |
| MOD16A2ET_2_STD                  | MODIS - February Evapotranspiration (standard deviation per catchment)         |
| MOD16A2ET_3_MAX                  | MODIS - March Evapotranspiration (maximum value per catchment)                 |
| MOD16A2ET_3_MEAN                 | MODIS - March Evapotranspiration (mean value per catchment)                    |
| MOD16A2ET_3_MIN                  | MODIS - March Evapotranspiration (minimum value per catchment)                 |
| MOD16A2ET_3_STD                  | MODIS - March Evapotranspiration (standard deviation per catchment)            |
| MOD16A2ET_4_MAX                  | MODIS - April Evapotranspiration (maximum value per catchment)                 |
| MOD16A2ET_4_MEAN                 | MODIS - April Evapotranspiration (mean value per catchment)                    |
| MOD16A2ET_4_MIN                  | MODIS - April Evapotranspiration (minimum value per catchment)                 |
| MOD16A2ET_4_STD                  | MODIS - April Evapotranspiration (standard deviation per catchment)            |

| <b>Variable Name</b>               | <b>Description</b>                                                                     |
|------------------------------------|----------------------------------------------------------------------------------------|
| MOD16A2ET_5_MAX                    | MODIS - May Evapotranspiration (maximum value per catchment)                           |
| MOD16A2ET_5_MEAN                   | MODIS - May Evapotranspiration (mean value per catchment)                              |
| MOD16A2ET_5_MIN                    | MODIS - May Evapotranspiration (minimum value per catchment)                           |
| MOD16A2ET_5_STD                    | MODIS - May Evapotranspiration (standard deviation per catchment)                      |
| MOD16A2ET_6_MAX                    | MODIS - June Evapotranspiration (maximum value per catchment)                          |
| MOD16A2ET_6_MEAN                   | MODIS - June Evapotranspiration (mean value per catchment)                             |
| MOD16A2ET_6_MIN                    | MODIS - June Evapotranspiration (minimum value per catchment)                          |
| MOD16A2ET_6_STD                    | MODIS - June Evapotranspiration (standard deviation per catchment)                     |
| MOD16A2ET_7_MAX                    | MODIS - July Evapotranspiration (maximum value per catchment)                          |
| MOD16A2ET_7_MEAN                   | MODIS - July Evapotranspiration (mean value per catchment)                             |
| MOD16A2ET_7_MIN                    | MODIS - July Evapotranspiration (minimum value per catchment)                          |
| MOD16A2ET_7_STD                    | MODIS - July Evapotranspiration (standard deviation per catchment)                     |
| MOD16A2ET_8_MAX                    | MODIS - August Evapotranspiration (maximum value per catchment)                        |
| MOD16A2ET_8_MEAN                   | MODIS - August Evapotranspiration (mean value per catchment)                           |
| MOD16A2ET_8_MIN                    | MODIS - August Evapotranspiration (minimum value per catchment)                        |
| MOD16A2ET_8_STD                    | MODIS - August Evapotranspiration (standard deviation per catchment)                   |
| MOD16A2ET_9_MAX                    | MODIS - September Evapotranspiration (maximum value per catchment)                     |
| MOD16A2ET_9_MEAN                   | MODIS - September Evapotranspiration (mean value per catchment)                        |
| MOD16A2ET_9_MIN                    | MODIS - September Evapotranspiration (minimum value per catchment)                     |
| MOD16A2ET_9_STD                    | MODIS - September Evapotranspiration (standard deviation per catchment)                |
| MOD17A3H_NPP_2004_2014_median_MAX  | MODIS - Net Primary Productivity Long-Term Median (maximum value per catchment)        |
| MOD17A3H_NPP_2004_2014_median_MEAN | MODIS - Net Primary Productivity Long-Term Median (mean value per catchment)           |
| MOD17A3H_NPP_2004_2014_median_MIN  | MODIS - Net Primary Productivity Long-Term Median (minimum value per catchment)        |
| MOD17A3H_NPP_2004_2014_median_STD  | MODIS - Net Primary Productivity Long-Term Median (standard deviation per catchment)   |
| ned17_MAX                          | NHDPlus - National Elevation Dataset (maximum value per catchment)                     |
| ned17_MEAN                         | NHDPlus - National Elevation Dataset (mean value per catchment)                        |
| ned17_MIN                          | NHDPlus - National Elevation Dataset (minimum value per catchment)                     |
| ned17_STD                          | NHDPlus - National Elevation Dataset (standard deviation per catchment)                |
| ned17shadedrelief_MAX              | NHDPlus - National Elevation Dataset, Shaded Relief (maximum value per catchment)      |
| ned17shadedrelief_MEAN             | NHDPlus - National Elevation Dataset, Shaded Relief (mean value per catchment)         |
| ned17shadedrelief_MIN              | NHDPlus - National Elevation Dataset, Shaded Relief (minimum value per catchment)      |
| ned17shadedrelief_STD              | NHDPlus - National Elevation Dataset, Shaded Relief (standard deviation per catchment) |
| pheno_AMP_ltmean_MAX               | MODIS Phenology - Amplitude (maximum value per catchment)                              |
| pheno_AMP_ltmean_MEAN              | MODIS Phenology - Amplitude (mean value per catchment)                                 |
| pheno_AMP_ltmean_MIN               | MODIS Phenology - Amplitude (minimum value per catchment)                              |
| pheno_AMP_ltmean_STD               | MODIS Phenology - Amplitude (standard deviation per catchment)                         |
| pheno_DUR_ltmean_MAX               | MODIS Phenology - Duration (maximum value per catchment)                               |

| <b>Variable Name</b>   | <b>Description</b>                                                                                          |
|------------------------|-------------------------------------------------------------------------------------------------------------|
| pheno_DUR_Itmean_MEAN  | MODIS Phenology - Duration (mean value per catchment)                                                       |
| pheno_DUR_Itmean_MIN   | MODIS Phenology - Duration (minimum value per catchment)                                                    |
| pheno_DUR_Itmean_STD   | MODIS Phenology - Duration (standard deviation per catchment)                                               |
| pheno_EOSN_Itmean_MAX  | MODIS Phenology - End of Season Normalized Difference Vegetation Index (maximum value per catchment)        |
| pheno_EOSN_Itmean_MEAN | MODIS Phenology - End of Season Normalized Difference Vegetation Index (mean value per catchment)           |
| pheno_EOSN_Itmean_MIN  | MODIS Phenology - End of Season Normalized Difference Vegetation Index (minimum value per catchment)        |
| pheno_EOSN_Itmean_STD  | MODIS Phenology - End of Season Normalized Difference Vegetation Index (standard deviation per catchment)   |
| pheno_EOST_Itmean_MAX  | MODIS Phenology - End of Season Time (maximum value per catchment)                                          |
| pheno_EOST_Itmean_MEAN | MODIS Phenology - End of Season Time (mean value per catchment)                                             |
| pheno_EOST_Itmean_MIN  | MODIS Phenology - End of Season Time (minimum value per catchment)                                          |
| pheno_EOST_Itmean_STD  | MODIS Phenology - End of Season Time (standard deviation per catchment)                                     |
| pheno_MAXN_Itmean_MAX  | MODIS Phenology - Maximum Normalized Difference Vegetation Index (maximum value per catchment)              |
| pheno_MAXN_Itmean_MEAN | MODIS Phenology - Maximum Normalized Difference Vegetation Index (maximum value per catchment)              |
| pheno_MAXN_Itmean_MIN  | MODIS Phenology - Maximum Normalized Difference Vegetation Index (maximum value per catchment)              |
| pheno_MAXN_Itmean_STD  | MODIS Phenology - Maximum Normalized Difference Vegetation Index (maximum value per catchment)              |
| pheno_SOSN_Itmean_MAX  | MODIS Phenology - Start of Season Normalized Difference Vegetation Index (maximum value per catchment)      |
| pheno_SOSN_Itmean_MEAN | MODIS Phenology - Start of Season Normalized Difference Vegetation Index (mean value per catchment)         |
| pheno_SOSN_Itmean_MIN  | MODIS Phenology - Start of Season Normalized Difference Vegetation Index (minimum value per catchment)      |
| pheno_SOSN_Itmean_STD  | MODIS Phenology - Start of Season Normalized Difference Vegetation Index (standard deviation per catchment) |
| pheno_SOST_Itmean_MAX  | MODIS Phenology - Start of Season Time (maximum value per catchment)                                        |
| pheno_SOST_Itmean_MEAN | MODIS Phenology - Start of Season Time (mean value per catchment)                                           |
| pheno_SOST_Itmean_MIN  | MODIS Phenology - Start of Season Time (minimum value per catchment)                                        |
| pheno_SOST_Itmean_STD  | MODIS Phenology - Start of Season Time (standard deviation per catchment)                                   |
| pheno_TIN_Itmean_MAX   | MODIS Phenology - Time Integrated Normalized Difference Vegetation Index (maximum value per catchment)      |
| pheno_TIN_Itmean_MEAN  | MODIS Phenology - Time Integrated Normalized Difference Vegetation Index (mean value per catchment)         |
| pheno_TIN_Itmean_MIN   | MODIS Phenology - Time Integrated Normalized Difference Vegetation Index (minimum value per catchment)      |
| pheno_TIN_Itmean_STD   | MODIS Phenology - Time Integrated Normalized Difference Vegetation Index (standard deviation per catchment) |
| ppt_30yr_norm_01_MAX   | PRISM - Normalized 30-Year Precipitation for January (maximum value per catchment)                          |
| ppt_30yr_norm_01_MEAN  | PRISM - Normalized 30-Year Precipitation for January (mean value per catchment)                             |
| ppt_30yr_norm_01_MIN   | PRISM - Normalized 30-Year Precipitation for January (minimum value per catchment)                          |
| ppt_30yr_norm_01_STD   | PRISM - Normalized 30-Year Precipitation for January (standard deviation per catchment)                     |
| ppt_30yr_norm_02_MAX   | PRISM - Normalized 30-Year Precipitation for February (maximum value per catchment)                         |
| ppt_30yr_norm_02_MEAN  | PRISM - Normalized 30-Year Precipitation for February (mean value per catchment)                            |
| ppt_30yr_norm_02_MIN   | PRISM - Normalized 30-Year Precipitation for February (minimum value per catchment)                         |
| ppt_30yr_norm_02_STD   | PRISM - Normalized 30-Year Precipitation for February (standard deviation per catchment)                    |
| ppt_30yr_norm_03_MAX   | PRISM - Normalized 30-Year Precipitation for March (maximum value per catchment)                            |
| ppt_30yr_norm_03_MEAN  | PRISM - Normalized 30-Year Precipitation for March (mean value per catchment)                               |

| <b>Variable Name</b>  | <b>Description</b>                                                                        |
|-----------------------|-------------------------------------------------------------------------------------------|
| ppt_30yr_norm_03_MIN  | PRISM - Normalized 30-Year Precipitation for March (minimum value per catchment)          |
| ppt_30yr_norm_03_STD  | PRISM - Normalized 30-Year Precipitation for March (standard deviation per catchment)     |
| ppt_30yr_norm_04_MAX  | PRISM - Normalized 30-Year Precipitation for April (maximum value per catchment)          |
| ppt_30yr_norm_04_MEAN | PRISM - Normalized 30-Year Precipitation for April (mean value per catchment)             |
| ppt_30yr_norm_04_MIN  | PRISM - Normalized 30-Year Precipitation for April (minimum value per catchment)          |
| ppt_30yr_norm_04_STD  | PRISM - Normalized 30-Year Precipitation for April (standard deviation per catchment)     |
| ppt_30yr_norm_05_MAX  | PRISM - Normalized 30-Year Precipitation for May (maximum value per catchment)            |
| ppt_30yr_norm_05_MEAN | PRISM - Normalized 30-Year Precipitation for May (mean value per catchment)               |
| ppt_30yr_norm_05_MIN  | PRISM - Normalized 30-Year Precipitation for May (minimum value per catchment)            |
| ppt_30yr_norm_05_STD  | PRISM - Normalized 30-Year Precipitation for May (standard deviation per catchment)       |
| ppt_30yr_norm_06_MAX  | PRISM - Normalized 30-Year Precipitation for June (maximum value per catchment)           |
| ppt_30yr_norm_06_MEAN | PRISM - Normalized 30-Year Precipitation for June (mean value per catchment)              |
| ppt_30yr_norm_06_MIN  | PRISM - Normalized 30-Year Precipitation for June (minimum value per catchment)           |
| ppt_30yr_norm_06_STD  | PRISM - Normalized 30-Year Precipitation for June (standard deviation per catchment)      |
| ppt_30yr_norm_07_MAX  | PRISM - Normalized 30-Year Precipitation for July (maximum value per catchment)           |
| ppt_30yr_norm_07_MEAN | PRISM - Normalized 30-Year Precipitation for July (mean value per catchment)              |
| ppt_30yr_norm_07_MIN  | PRISM - Normalized 30-Year Precipitation for July (minimum value per catchment)           |
| ppt_30yr_norm_07_STD  | PRISM - Normalized 30-Year Precipitation for July (standard deviation per catchment)      |
| ppt_30yr_norm_08_MAX  | PRISM - Normalized 30-Year Precipitation for August (maximum value per catchment)         |
| ppt_30yr_norm_08_MEAN | PRISM - Normalized 30-Year Precipitation for August (mean value per catchment)            |
| ppt_30yr_norm_08_MIN  | PRISM - Normalized 30-Year Precipitation for August (minimum value per catchment)         |
| ppt_30yr_norm_08_STD  | PRISM - Normalized 30-Year Precipitation for August (standard deviation per catchment)    |
| ppt_30yr_norm_09_MAX  | PRISM - Normalized 30-Year Precipitation for September (maximum value per catchment)      |
| ppt_30yr_norm_09_MEAN | PRISM - Normalized 30-Year Precipitation for September (mean value per catchment)         |
| ppt_30yr_norm_09_MIN  | PRISM - Normalized 30-Year Precipitation for September (minimum value per catchment)      |
| ppt_30yr_norm_09_STD  | PRISM - Normalized 30-Year Precipitation for September (standard deviation per catchment) |
| ppt_30yr_norm_10_MAX  | PRISM - Normalized 30-Year Precipitation for October (maximum value per catchment)        |
| ppt_30yr_norm_10_MEAN | PRISM - Normalized 30-Year Precipitation for October (mean value per catchment)           |
| ppt_30yr_norm_10_MIN  | PRISM - Normalized 30-Year Precipitation for October (minimum value per catchment)        |
| ppt_30yr_norm_10_STD  | PRISM - Normalized 30-Year Precipitation for October (standard deviation per catchment)   |
| ppt_30yr_norm_11_MAX  | PRISM - Normalized 30-Year Precipitation for November (maximum value per catchment)       |
| ppt_30yr_norm_11_MEAN | PRISM - Normalized 30-Year Precipitation for November (mean value per catchment)          |
| ppt_30yr_norm_11_MIN  | PRISM - Normalized 30-Year Precipitation for November (minimum value per catchment)       |
| ppt_30yr_norm_11_STD  | PRISM - Normalized 30-Year Precipitation for November (standard deviation per catchment)  |
| ppt_30yr_norm_12_MAX  | PRISM - Normalized 30-Year Precipitation for December (maximum value per catchment)       |
| ppt_30yr_norm_12_MEAN | PRISM - Normalized 30-Year Precipitation for December (mean value per catchment)          |
| ppt_30yr_norm_12_MIN  | PRISM - Normalized 30-Year Precipitation for December (minimum value per catchment)       |



| Variable Name             | Description                                                                              |
|---------------------------|------------------------------------------------------------------------------------------|
| ppt_30yr_norm_12_STD      | PRISM - Normalized 30-Year Precipitation for December (standard deviation per catchment) |
| ppt_30yr_norm_annual_MAX  | PRISM - Normalized, Annual 30-Year Precipitation (maximum value per catchment)           |
| ppt_30yr_norm_annual_MEAN | PRISM - Normalized, Annual 30-Year Precipitation (mean value per catchment)              |
| ppt_30yr_norm_annual_MIN  | PRISM - Normalized, Annual 30-Year Precipitation (minimum value per catchment)           |
| ppt_30yr_norm_annual_STD  | PRISM - Normalized, Annual 30-Year Precipitation (standard deviation per catchment)      |
| shrub_cov_evc_MAX         | LANDFIRE - Shrub Existing Vegetation Cover (maximum value per catchment)                 |
| shrub_cov_evc_MEAN        | LANDFIRE - Shrub Existing Vegetation Cover (mean value per catchment)                    |
| shrub_cov_evc_MIN         | LANDFIRE - Shrub Existing Vegetation Cover (minimum value per catchment)                 |
| shrub_cov_evc_STD         | LANDFIRE - Shrub Existing Vegetation Cover (standard deviation per catchment)            |
| shrub_hgt_evh_MAX         | LANDFIRE - Shrub Existing Vegetation Height (maximum value per catchment)                |
| shrub_hgt_evh_MEAN        | LANDFIRE - Shrub Existing Vegetation Height (mean value per catchment)                   |
| shrub_hgt_evh_MIN         | LANDFIRE - Shrub Existing Vegetation Height (minimum value per catchment)                |
| shrub_hgt_evh_STD         | LANDFIRE - Shrub Existing Vegetation Height (standard deviation per catchment)           |
| tree_cov_evc_MAX          | LANDFIRE - Tree Existing Vegetation Cover (maximum value per catchment)                  |
| tree_cov_evc_MEAN         | LANDFIRE - Tree Existing Vegetation Cover (mean value per catchment)                     |
| tree_cov_evc_MIN          | LANDFIRE - Tree Existing Vegetation Cover (minimum value per catchment)                  |
| tree_cov_evc_STD          | LANDFIRE - Tree Existing Vegetation Cover (standard deviation per catchment)             |
| tree_hgt_evh_MAX          | LANDFIRE - Tree Existing Vegetation Height (maximum value per catchment)                 |
| tree_hgt_evh_MEAN         | LANDFIRE - Tree Existing Vegetation Height (mean value per catchment)                    |
| tree_hgt_evh_MIN          | LANDFIRE - Tree Existing Vegetation Height (minimum value per catchment)                 |
| tree_hgt_evh_STD          | LANDFIRE - Tree Existing Vegetation Height (standard deviation per catchment)            |
| WHP_MAX                   | USFS - Wildfire Hazard Potential (maximum value per catchment)                           |
| WHP_MEAN                  | USFS - Wildfire Hazard Potential (mean value per catchment)                              |
| WHP_MIN                   | USFS - Wildfire Hazard Potential (minimum value per catchment)                           |
| WHP_STD                   | USFS - Wildfire Hazard Potential (standard deviation per catchment)                      |

A total of 280 variables (i.e., variable-statistical moment combinations) were created as input data to cluster analysis by calculating the four statistical moments (mean, minimum, maximum, and standard deviation values) for each of 16 key biophysical and hydrological attributes. The cluster analysis was performed to group Columbia River basin NHDPlusV2.1 catchments into six classes sharing similar characteristics. The 16 key biophysical and hydrological variables include: 1) MODIS-derived existing vegetation cover, percent (shrub, tree, and herbaceous vegetation; %); 2) MODIS-derived existing vegetation cover (shrub, tree, and herbaceous vegetation), height (m); 3) eMODIS Phenology-derived net primary productivity (NPP), long-term median ( $\text{kg C m}^{-2} \text{y}^{-1}$ ); 4) eMODIS Phenology-derived net ecosystem productivity (NEP), long-term median ( $\text{kg C m}^{-2} \text{y}^{-1}$ ); 5) eMODIS Phenology-derived amplitude (day of the year); 6) eMODIS Phenology-derived length of growing season (number of days); 7) eMODIS Phenology-derived time of growing season, start-of-season and end-of-season (day of year); 8) eMODIS Phenology-derived normalized difference vegetation index (NDVI), start-of-season, end-of-season, maximum, and time-integrated NDVI values; 9) MODIS-derived leaf area index (LAI;  $\text{m}^2$  green leaf area per  $\text{m}^2$  land area); 10) MODIS-derived fraction of photosynthetically active radiation (FPAR), monthly and long-term median (%); 11) MODIS-derived total evapotranspiration (ET), monthly and long-term median ( $\text{kg H}_2\text{O m}^{-2} \text{land area d}^{-1}$ ); 12) PRISM-derived 30-year precipitation (PPT), normalized monthly and normalized annual (mm); 13) National Elevation Dataset (NED)-derived elevation (m); 14) National Elevation Dataset (NED)-derived slope (%); 15) National Elevation Dataset (NED)-derived aspect; and 16) LANDFIRE-derived USFS Wildfire Hazard Potential (WHP). See the Code and Data Availability section for more information on the source of these data and how these data were processed and analyzed for use in this study. and procto the code and data used to perform the catchment cluster analysis.

30 **Table S2. Key biophysical and hydrological variable-statistical moment combinations evaluated for use in the Columbia River catchment cluster analysis.**

| Variable Set   | Description                                                    | Variables <sup>b</sup> | Moments <sup>c</sup> | Months                | <i>n</i> | Notes                                 |
|----------------|----------------------------------------------------------------|------------------------|----------------------|-----------------------|----------|---------------------------------------|
| 0              | All zonal and tabulation statistical moments for all variables | All                    | All                  | January–December      | 280      |                                       |
| 1              | All variables using zonal mean only                            | All                    | zonal mean           | January–December      | 70       |                                       |
| 2              | Set 1 AND only months 3, 7, and 11 for FPAR, LAI, ET, and PPT  | FPAR, LAI, ET, PPT     | zonal mean           | March, July, November | 30       |                                       |
| 3              | Set 1 AND only long-term median for FPAR, LAI, ET, and PPT     | FPAR, LAI, ET, PPT     | long-term median     | March, July, November | 22       |                                       |
| 4              | Set 3 with FPAR and PPT                                        | FPAR, PPT              | long-term median     | March, July, November | 20       | Dropped LAI, ET                       |
| 5              | Set 3 with LAI and PPT                                         | LAI, PPT               | long-term median     | March, July, November | 20       | Dropped FPAR, ET                      |
| 6              | Set 3 with ET and PPT                                          | ET, PPT                | long-term median     | March, July, November | 20       | Dropped FPAR, LAI                     |
| 7              | All variables using zonal SD only                              | All                    | zonal SD             | January–December      | 70       |                                       |
| 8 <sup>a</sup> | All variables using zonal mean and SD                          | All                    | zonal mean, zonal SD | January–December      | 140      |                                       |
| 9              | Set 2 with only FPAR and PPT                                   | FPAR, PPT              | zonal mean           | March, July, November | 24       |                                       |
| 10             | Set 2 with only LAI and PPT                                    | LAI, PPT               | zonal mean           | March, July, November | 24       |                                       |
| 11             | Set 2 with only ET and PPT                                     | ET, PPT                | zonal mean           | March, July, November | 24       |                                       |
| 12             | PCA derived from means of all variables                        | All                    | mean                 | January - December    | 30       | Used top 30 PCA components (PC1–PC30) |

<sup>a</sup> Variable set 8 was used in the final Columbia River basin catchment cluster analysis. The data set includes two statistical moments (zonal mean and zonal SD) for the key biophysical and hydrological variables shown in Table S1.

<sup>b</sup> The description for the 13 variable sets analyzed using cluster analysis lists the key biophysical and hydrological variables and the statistical moments for each key variable included in a specific variable set. FPAR (%) is the MODIS-derived fraction of photosynthetically active radiation for the month(s) indicated. LAI (m<sup>2</sup> green leaf area per m<sup>-2</sup> land area) is the MODIS-derived Leaf Area Index for the month(s) indicated. ET (kg H<sub>2</sub>O m<sup>-2</sup> d<sup>-1</sup>) is the MODIS-derived total evapotranspiration for the month(s) indicated. PPT (mm) is the PRISM-derived, normalized 30-year precipitation for the month(s) indicated.

<sup>c</sup> Key biophysical and hydrological variables in each variable includes either 1) all the key variables shown in Table S1 or 2) a subset of the key variables shown in Table S1.

<sup>d</sup> “All” includes the following four statistical moments calculated for the key variables in each variable set: 1) mean value, 2) minimum value, 3) maximum value, and 4) standard deviation (SD), and 5) long-term median value calculated for the variables listed.

<sup>e</sup> *n* is the total number of key variable-statistical moment combinations in each variable set.

**Table S3. Expanded cluster analysis results characterizing NHDPlusV2.1 catchments across the Columbia River basin and Yakima River basin with similar biophysical and hydrologic characteristics and the number and percentage of sites in each.**

| <b>Cluster</b> | <b>Name</b>                           | <b>CRB Catchments</b> | <b>CRB Drainage Area</b> | <b>YRB Catchments</b> | <b>YRB Drainage Area</b> | <b>YRB Sites Per Cluster</b> | <b>Percent YRB Sites Per Cluster</b> |
|----------------|---------------------------------------|-----------------------|--------------------------|-----------------------|--------------------------|------------------------------|--------------------------------------|
| <b>1</b>       | Tree dominated high elevation mesic   | 41,153                | 23%                      | 1,553                 | 27%                      | 9                            | 19%                                  |
| <b>2</b>       | Water dominated                       | 6,188                 | 34%                      | 127                   | 2%                       | 0                            | 0%                                   |
| <b>3</b>       | Tree dominated high elevation hydric  | 13,223                | 7%                       | 136                   | 2%                       | 2                            | 4%                                   |
| <b>4</b>       | Shrub-steppe middle elevation xeric   | 46,028                | 25%                      | 1,591                 | 28%                      | 10                           | 21%                                  |
| <b>5</b>       | Tree dominated middle elevation mesic | 31,549                | 17%                      | 982                   | 17%                      | 13                           | 28%                                  |
| <b>6</b>       | Tree dominated middle elevation xeric | 43,390                | 24%                      | 1,282                 | 23%                      | 13                           | 28%                                  |

“CRB Catchments” is the number of NHDPlusV2.1 catchments within the Columbia River basin classified in each cluster type. “CRB Drainage Area” is the percentage of the total drainage area of the Columbia River basin that was classified in each cluster. “YRB Catchments” is the number of NHDPlusV2.1 catchments within the Yakima River basin classified in each cluster. “YRB Drainage Area” is the percentage of the total drainage area of the Yakima River basin that was classified in each cluster. “YRB Sites Per Cluster” is the total number of field sites in the Yakima River basin located in each cluster. “YRB Sites Per Cluster” is the percentage of field sites located in each cluster.

Table S4. Name or molecular formula and mass for 1,255 commonly observed biochemical transformations.

| Name                             | Mass       |
|----------------------------------|------------|
| CH4_O                            | 0.036380   |
| NH_CH2                           | 0.995250   |
| 2ndIP                            | 1.997000   |
| Na_H                             | 21.981940  |
| CH3COO-                          | 59.013305  |
| PO43-                            | 94.953423  |
| SO42-                            | 95.951732  |
| NO3-                             | 61.987819  |
| NH4+                             | 18.034374  |
| H2S                              | 33.987722  |
| S2O32-                           | 111.928889 |
| Alanine                          | 71.037114  |
| Arginine                         | 156.101111 |
| Asparagine                       | 114.042928 |
| Aspartic Acid                    | 115.026943 |
| Cysteine                         | 103.009186 |
| Cystine                          | 222.013286 |
| Glutamic Acid                    | 129.042593 |
| Glutamine                        | 128.058578 |
| Glycine                          | 57.021464  |
| Histidine                        | 137.058912 |
| Isoleucine                       | 113.084064 |
| Lysine                           | 128.094963 |
| Methionine                       | 131.040486 |
| Phenylalanine                    | 147.068414 |
| Proline                          | 97.052764  |
| Serine                           | 87.032028  |
| Threonine                        | 101.047679 |
| Tryptophan                       | 186.079313 |
| Tyrosine                         | 163.063329 |
| Valine                           | 99.068414  |
| acetotacetate (-H2O)             | 84.021129  |
| acetone (-H)                     | 57.034040  |
| adenylate (-H2O)                 | 329.052522 |
| biotinyl (-H)                    | 243.080339 |
| biotinyl (-H2O)                  | 226.077600 |
| carbamoyl P transfer (-H2PO4)    | 44.013639  |
| co-enzyme A (-H)                 | 765.099566 |
| co-enzyme A (-H2O)               | 748.096826 |
| glutathione (-H2O)               | 289.073243 |
| isoprene addition (-H)           | 67.054775  |
| malonyl group (-H2O)             | 86.000394  |
| palmitoylation (-H2O)            | 238.229666 |
| pyridoxal phosphate (-H2O)       | 229.014011 |
| urea addition (-H)               | 59.024538  |
| adenine (-H)                     | 134.046670 |
| adenosine (-H2O)                 | 249.086189 |
| Adenosine 5'-diphosphate (-H2O)  | 409.018854 |
| cytidine 5' diphosphate (-H2O)   | 385.007621 |
| cytidine 5' monophosphate (-H2O) | 305.041288 |

| Name                                 | Mass       |
|--------------------------------------|------------|
| cytosine (-H)                        | 110.035437 |
| Guanosine 5- diphosphate (-H2O)      | 425.013769 |
| Guanosine 5- monophosphate (-H2O)    | 345.047436 |
| guanine (-H)                         | 150.041585 |
| guanosine (-H2O)                     | 265.081104 |
| deoxythymidine 5' diphosphate (-H2O) | 384.012372 |
| thymidine (-H2O)                     | 224.079707 |
| thymine (-H)                         | 125.035103 |
| thymidine 5' monophosphate (-H2O)    | 304.046039 |
| uridine 5' diphosphate (-H2O)        | 385.991636 |
| uridine 5' monophosphate (-H2O)      | 306.025304 |
| uracil (-H)                          | 111.019452 |
| uridine (-H2O)                       | 226.058972 |
| acetylation (-H)                     | 59.013304  |
| acetylation (-H2O)                   | 42.010565  |
| C2H2                                 | 26.015650  |
| Carboxylation                        | 43.989829  |
| CHO2                                 | 44.997654  |
| condensation/dehydration             | 18.010565  |
| diphosphate                          | 160.940490 |
| ethyl addition (-H2O)                | 28.031300  |
| Formic Acid (-H2O)                   | 27.994915  |
| glyoxylate (-H2O)                    | 55.989829  |
| hydrogenation/dehydrogenation        | 2.015650   |
| hydroxylation (-H)                   | 15.994915  |
| Inorganic Phosphate                  | 30.973763  |
| methanol (-H2O)                      | 14.015650  |
| phosphate                            | 79.966332  |
| primary amine                        | 16.018724  |
| pyrophosphate                        | 61.947527  |
| secondary amine                      | 15.010899  |
| sulfate (-H2O)                       | 79.956816  |
| tertiary amine                       | 14.003074  |
| C6H10O5                              | 162.052824 |
| C6H10O6                              | 178.047738 |
| D-Ribose (-H2O) (ribosylation)       | 132.042259 |
| disaccharide (-H2O)                  | 340.100562 |
| glucose-N-Phosphate (-H2O)           | 242.019156 |
| Glucuronic Acid (-H2O)               | 176.032088 |
| trisaccharide (-H2O)                 | 486.158471 |
| erythrose (-H2O)                     | 102.031695 |
| transamination (-O)                  | 2.039459   |
| H2N1O_1                              | 0.023809   |
| C_1H_5N_1O2                          | 0.947631   |
| H_1O1N_1                             | 0.984016   |
| C_1H_1N1                             | 0.995249   |
| C12_C13                              | 1.003355   |
| H1                                   | 1.007825   |
| H3N1O_3S1                            | 1.013876   |
| H3O_1N1                              | 1.031634   |
| H_2N_2O2                             | 1.968032   |
| H_1O_2C11                            | 1.971200   |

| Name         | Mass      |
|--------------|-----------|
| C_1H_2O1     | 1.979265  |
| N_1O1        | 1.991841  |
| H_1O_1F1     | 1.995700  |
| H2           | 2.015650  |
| CH6O_1       | 2.052035  |
| H_3N_3O3     | 2.952048  |
| C_1H1N1O_2S1 | 2.993141  |
| H1O1N_1      | 2.999666  |
| H3           | 3.023475  |
| H5O_1N1      | 3.047284  |
| C_1O1        | 3.994915  |
| H4           | 4.031300  |
| H3N_1O1      | 5.015316  |
| C4H6N1O_2P_1 | 5.086431  |
| C_2H_2O2     | 5.974180  |
| H_4N3O_2     | 5.988092  |
| C2H_2O_1     | 5.989435  |
| C_1H2O       | 6.010565  |
| C3H2O_2      | 6.025820  |
| H6           | 6.046950  |
| C_1H1N_1S1   | 6.976823  |
| H5O1N_1      | 7.030966  |
| CH_4         | 7.968700  |
| C_2O2        | 7.989830  |
| C2O_1        | 8.005085  |
| C_1H4O       | 8.026215  |
| C3H4O_2      | 8.041470  |
| H8           | 8.062600  |
| C_2N_1O1P1   | 8.965604  |
| C1H_1N1O_1   | 9.000334  |
| C2H3N1O_2    | 9.036719  |
| H_6O1        | 9.947965  |
| C_3H_2O3     | 9.969095  |
| H_2C1        | 9.984350  |
| C_2H2O2      | 10.005480 |
| C2H2O_1      | 10.020735 |
| H10          | 10.078250 |
| N1H_3        | 10.979599 |
| C1H_1        | 10.992175 |
| C1H1N1O_1    | 11.015984 |
| H_4O1        | 11.963615 |
| C1           | 12.000000 |
| C2H4O_1      | 12.036385 |
| H_3O1        | 12.971440 |
| CH_1N_1O     | 12.984016 |
| H_1N1        | 12.995249 |
| CH           | 13.007825 |
| C1H3N1O_1    | 13.031634 |
| C_1H_6O2     | 13.942880 |
| H_2O1        | 13.979265 |
| N1           | 14.003074 |
| CH2          | 14.015650 |

| Name           | Mass      |
|----------------|-----------|
| H2N2O_1        | 14.026883 |
| C2H6O_1        | 14.052035 |
| H_1S1O_1       | 14.969332 |
| H_1O1          | 14.987090 |
| CHN_1O         | 14.999666 |
| H1N1           | 15.010900 |
| C1H3           | 15.023475 |
| CH5NO_1        | 15.047284 |
| C_1H_4O2       | 15.958530 |
| O_1S1          | 15.977157 |
| O1             | 15.994915 |
| H1O1P1S_1      | 16.004431 |
| H2N1           | 16.018724 |
| C1H4           | 16.031300 |
| O_1H4N2        | 16.042533 |
| C2H8O_1        | 16.067685 |
| H16            | 16.125200 |
| H_1O2N_1       | 16.978931 |
| O1H1           | 17.002740 |
| C3H_1N1O_2     | 17.005419 |
| H3N1           | 17.026549 |
| C1H5           | 17.039125 |
| H_1C11O_1      | 17.966100 |
| C_1H_2O2       | 17.974180 |
| H2O_1S1        | 17.992807 |
| H2O            | 18.010565 |
| CH6            | 18.046950 |
| H6N2O_1        | 18.058183 |
| C_8H_9N1O1P2S1 | 18.847162 |
| H1O2N_1        | 18.994581 |
| H3O1           | 19.018390 |
| H5N1           | 19.042199 |
| C_10H_2O5P2    | 19.906451 |
| C_1O2          | 19.989830 |
| C3O_1          | 20.005085 |
| H4O            | 20.026215 |
| C2H_2          | 21.984350 |
| C_1H2O2        | 22.005480 |
| C3H2O_1        | 22.020735 |
| CH_4O          | 23.963615 |
| C2             | 24.000000 |
| C1O_1N2        | 24.011233 |
| C_1H4O2        | 24.021130 |
| C3H4O_1        | 24.036385 |
| C1H_1N1        | 24.995249 |
| C2H3NO_1       | 25.031634 |
| H_2C1O1        | 25.979265 |
| C1H2O_1N2      | 26.026883 |
| C2H2O2S_1      | 26.033408 |
| C3H6O_1        | 26.052035 |
| C2HN_1O        | 26.999666 |
| C1H1N1         | 27.010900 |

| Name                      | Mass      |
|---------------------------|-----------|
| H3C2                      | 27.023475 |
| C2H5O_1N1                 | 27.047284 |
| H_4O2                     | 27.958530 |
| C_4H1N2O1P1               | 27.982651 |
| Formic Acid_(H2O)_CO      | 27.994915 |
| N2                        | 28.006148 |
| ethyl addition_(H2O)_C2H4 | 28.031300 |
| C15H22O_7P_2              | 28.260219 |
| H_1N1O1                   | 28.990164 |
| CHO                       | 29.002740 |
| CH3N                      | 29.026549 |
| C2H7N1O_1                 | 29.062934 |
| H_2S1                     | 29.956422 |
| H_2O2                     | 29.974180 |
| O1N1                      | 29.997989 |
| C1H2O1                    | 30.010565 |
| H_1S1                     | 30.964247 |
| CHN_1O2                   | 30.994581 |
| H1N1O1                    | 31.005814 |
| C1H5N1                    | 31.042200 |
| H_3Cl1                    | 31.945400 |
| O_2S2                     | 31.954314 |
| S1                        | 31.972072 |
| O2                        | 31.989830 |
| C1H4O_1S1                 | 32.008457 |
| C1H4O1                    | 32.026215 |
| C2H8                      | 32.062600 |
| H3O_1N1S1                 | 33.003706 |
| H_1Cl1                    | 33.961000 |
| H2O2                      | 34.005480 |
| C4H2O_1                   | 34.020735 |
| C1H6O1                    | 34.041865 |
| H2O_1Cl1N1                | 34.992700 |
| H3O2                      | 35.013305 |
| C3H1N1O_1                 | 35.015984 |
| C4H4N1P_1                 | 35.060611 |
| C_1H1O1P1                 | 35.976500 |
| H1Cl1                     | 35.976600 |
| C_1O3                     | 35.984745 |
| C3                        | 36.000000 |
| H4O2                      | 36.021130 |
| C4H4O_1                   | 36.036385 |
| C3H3N1O_1                 | 37.031618 |
| C5H2N5O_4P_1              | 37.077600 |
| C2H_2O                    | 37.979265 |
| C3H2                      | 38.015650 |
| O2H6                      | 38.036780 |
| C4H6O_1                   | 38.052035 |
| C3H5N1O_1                 | 39.047284 |
| C4H9N1O_2                 | 39.083669 |
| C_7H_2O4P2                | 39.911536 |
| CH_4O2                    | 39.958530 |



| Name                    | Mass      |
|-------------------------|-----------|
| C2O1                    | 39.994915 |
| C3H4                    | 40.031300 |
| C4H8O_1                 | 40.067685 |
| C2HO                    | 41.002740 |
| C2H3N                   | 41.026549 |
| C3H7N1O_1               | 41.062934 |
| H_2S1C1                 | 41.956422 |
| C1H_2O2                 | 41.974180 |
| acetylation_(H2O)_C2H2O | 42.010565 |
| C1H2N2                  | 42.021800 |
| C3H6                    | 42.046950 |
| C1H_1O2                 | 42.982005 |
| C1H1O1N1                | 43.005814 |
| C2H3O                   | 43.018390 |
| C2H5N                   | 43.042199 |
| C2H5N1                  | 43.042200 |
| C3H7                    | 43.054775 |
| Carboxylation_CO2       | 43.989830 |
| C2H4O1                  | 44.026215 |
| C3H8                    | 44.062600 |
| C4H12O_1                | 44.098985 |
| H_1N1O2                 | 44.985079 |
| C2H3N_1O2               | 45.010231 |
| CH3NO                   | 45.021464 |
| C2H5O1                  | 45.034040 |
| C2H7N1                  | 45.057849 |
| H_2O3                   | 45.969095 |
| C1H2O2                  | 46.005480 |
| C2H6O1                  | 46.041865 |
| H1O2N1                  | 47.000729 |
| C1H5N1O_1S1             | 47.019356 |
| O1S1                    | 47.966987 |
| O3                      | 47.984745 |
| C4                      | 48.000000 |
| C1H4S1                  | 48.003372 |
| C1H4O2                  | 48.021130 |
| C2H8O                   | 48.057515 |
| H1O3                    | 48.992570 |
| C1H5O2                  | 49.028955 |
| H2O3                    | 50.000379 |
| C4H2                    | 50.015650 |
| C3H2N2O_1               | 50.026883 |
| CH6O2                   | 50.036757 |
| C4H5N1O_1               | 51.047284 |
| C3H13N7O_6              | 51.153753 |
| C_1H1O2P1               | 51.971418 |
| C3O                     | 51.994927 |
| H4O3                    | 52.016012 |
| C4H4                    | 52.031300 |
| C3H4N2O_1               | 52.042533 |
| C5H8O_1                 | 52.067685 |
| C2H_1O_1N1S1            | 52.972406 |

| Name                  | Mass      |
|-----------------------|-----------|
| C3H3N                 | 53.026581 |
| C5H7N_1               | 53.051701 |
| C_7H_4O5P2            | 53.890801 |
| C_2H_2O1S2            | 53.923409 |
| O_1Cl2                | 53.942800 |
| C2H_2O2               | 53.974182 |
| C3H2O1                | 54.010565 |
| C4H6                  | 54.046947 |
| C3H3O1                | 55.018390 |
| #N/A-1                | 55.042199 |
| C7H5N1O_3             | 55.057454 |
| H_1O_3Cl3             | 55.914000 |
| CH_4O3                | 55.953422 |
| glyoxylate_(H2O)_C2O2 | 55.989830 |
| C2H3Cl_1O2S1          | 56.016500 |
| C3H4O1                | 56.026215 |
| C2H4N2                | 56.037448 |
| C4H8                  | 56.062585 |
| Glycine_C2H3NO        | 57.021464 |
| acetone_(H)_C3H5O     | 57.034040 |
| C3H7N1                | 57.057840 |
| C1H_1o1               | 57.925300 |
| #N/A-2                | 57.969083 |
| C2H2O2                | 58.005480 |
| C1H2N2O1              | 58.016713 |
| C3H6O1                | 58.041864 |
| C3H8N1                | 58.065674 |
| C3H10N2O_1            | 58.089483 |
| C2H5N1O_1S1           | 59.019356 |
| C2H5N1O1              | 59.037114 |
| CO3                   | 59.984729 |
| C2H4O2                | 60.021129 |
| C1H4N2O1              | 60.032363 |
| C3H8O1                | 60.057489 |
| C3H10N1               | 60.081324 |
| C1H3N1S1              | 60.998621 |
| C1H3N1O2              | 61.016379 |
| C2H7O1N1              | 61.052764 |
| C1H7N3                | 61.063997 |
| #N/A-3                | 61.964011 |
| C1H3Cl1               | 61.992300 |
| C1H2O3                | 62.000376 |
| C2H6S1                | 62.019022 |
| C2H6O2                | 62.036765 |
| C4H3O_1N2             | 63.034708 |
| O2S1                  | 63.961902 |
| H1O2P1                | 63.971418 |
| O4                    | 63.979660 |
| H1O4S_1P1             | 63.989176 |
| C4O                   | 63.994945 |
| C1H1O2F1              | 63.996000 |
| C1H4O1S1              | 63.998287 |

| <b>Name</b>    | <b>Mass</b> |
|----------------|-------------|
| C1H4O3         | 64.016034   |
| C5H4           | 64.031300   |
| C4H3N1         | 65.026549   |
| #N/A-4         | 65.031479   |
| H2O2S1         | 65.977552   |
| H3O2P1         | 65.987068   |
| H2O4           | 65.995310   |
| C5H3Cl1O_2     | 66.002500   |
| C4H2O          | 66.010585   |
| C4O2           | 66.031707   |
| C5H6           | 66.046935   |
| H1C2N3         | 67.017047   |
| C5H5N_1O1      | 67.030966   |
| C4H5N1         | 67.042199   |
| C3O2           | 67.989843   |
| C4H4O1         | 68.026215   |
| C5H8           | 68.062600   |
| C4H6N1O2S_1    | 68.067782   |
| C3H3N1O1       | 69.021452   |
| C4H7N1         | 69.057849   |
| Cl2            | 69.937700   |
| CH_2O3         | 69.969101   |
| C3H2O2         | 70.005480   |
| C4H6O1         | 70.041867   |
| C4H10N2O_1     | 70.089483   |
| C6H14O_1       | 70.114635   |
| C2H1N1O2       | 71.000729   |
| C3H3O2         | 71.013305   |
| Alanine_C3H5NO | 71.037114   |
| C4H9N1         | 71.073499   |
| C5H13O_1N1     | 71.109884   |
| H_1O_2Cl3      | 71.908900   |
| C2O3           | 71.984745   |
| C3H4O2         | 72.021131   |
| C4H8O1         | 72.057515   |
| C4H12N2O_1     | 72.105133   |
| C2H3N1O2       | 73.016379   |
| C3H7O1N1       | 73.052761   |
| C2H2O3         | 74.000388   |
| C3H6O2         | 74.036780   |
| C4H10O         | 74.073184   |
| C8H10O_2       | 74.088420   |
| C2H5N1O2       | 75.032029   |
| C6H5N1O_1      | 75.047284   |
| C1H_2N_1O5     | 75.955851   |
| C2H1O1Cl1      | 75.971600   |
| C2H4O3         | 76.016045   |
| C6H4           | 76.031300   |
| C5H3N1         | 77.026549   |
| C1H7N3O1       | 77.058912   |
| CH2O4          | 77.995309   |
| C5H2O          | 78.010626   |

| Name                       | Mass      |
|----------------------------|-----------|
| C2H6O3                     | 78.031687 |
| C5H4N1                     | 78.034374 |
| C5H8N3O_2                  | 78.081992 |
| H_1O3S1                    | 78.948992 |
| O3P1                       | 78.958508 |
| C5H5N1                     | 79.042199 |
| O3S1                       | 79.956817 |
| H1O3P1                     | 79.966333 |
| C1H5O2P1                   | 80.002718 |
| #N/A-5                     | 80.018600 |
| C5H4O1                     | 80.026215 |
| C6H8                       | 80.062600 |
| H1O3S1                     | 80.964642 |
| H3N1O2S1                   | 80.988451 |
| C5H7N1                     | 81.057849 |
| C6H11O_1N1                 | 81.094234 |
| H2O3S1                     | 81.972467 |
| C4H2O2                     | 82.005480 |
| C5H6O1                     | 82.041872 |
| C6H9O2P_1                  | 82.086492 |
| H2N_1O4P1                  | 82.965999 |
| C5H9N1                     | 83.073499 |
| C3O3                       | 83.984740 |
| acetotacetate_(H2O)_C4H4O2 | 84.021137 |
| C4H4O4S_1                  | 84.038888 |
| C5H8O1                     | 84.057515 |
| C3H3N1O2                   | 85.016379 |
| C4H7N1O1                   | 85.052738 |
| malonyl_group_(H2O)_C3H2O3 | 86.000421 |
| C4H6O2                     | 86.036780 |
| C5H10O1                    | 86.073165 |
| C5H12N1                    | 86.096974 |
| C6H14                      | 86.109550 |
| C7H1N_1O1                  | 86.999666 |
| C4H9O1N1                   | 87.068414 |
| C3H4O3                     | 88.016045 |
| C7H4                       | 88.031300 |
| C3H6N1O2                   | 88.039854 |
| C4H8O2                     | 88.052422 |
| C3H3N_1O4                  | 89.000061 |
| C6H3N1                     | 89.026549 |
| C3H7N1O2                   | 89.047679 |
| C7H7O_1N1                  | 89.062934 |
| C2H2O4                     | 89.995294 |
| C3H6O3                     | 90.031695 |
| C2O2H6N2                   | 90.042928 |
| C7H6                       | 90.046950 |
| C6H5N1                     | 91.042199 |
| C2H4O4                     | 92.010938 |
| C6H4O1                     | 92.026215 |
| C3H8O3                     | 92.047367 |
| C7H8                       | 92.062600 |

| <b>Name</b>       | <b>Mass</b> |
|-------------------|-------------|
| C5H3N1O1          | 93.021464   |
| C4H3N3            | 93.032697   |
| C6H7N1            | 93.057849   |
| C5H7N3O_1         | 93.069082   |
| C5H2O2            | 94.005480   |
| C4H2O1N2          | 94.016713   |
| C2H6O4            | 94.026603   |
| C1H5O_1N1S1e1     | 94.963800   |
| C5H5N1O1          | 95.037114   |
| H1O4P1            | 95.961248   |
| C4O3              | 95.984745   |
| C5H4O2            | 96.021130   |
| C4H4N2O1          | 96.032363   |
| C6H8O             | 96.057515   |
| H_1N_1O3S2        | 96.917990   |
| H3O3N1S1          | 96.983366   |
| H4N1O3P1          | 96.992882   |
| C4H3O2N1          | 97.016379   |
| Proline_C5H7NO    | 97.052764   |
| H3O4P1            | 97.976898   |
| C4H2O3            | 98.000395   |
| C5H6O2            | 98.036780   |
| C6H10O1           | 98.073165   |
| C4H5N1O2          | 99.032029   |
| C8H5N1O_1         | 99.047284   |
| Valine_C5H9NO     | 99.068414   |
| C4H4O3            | 100.016045  |
| C5H8O2            | 100.052430  |
| C4H8O1N2          | 100.063663  |
| C3H3O3N1          | 101.011294  |
| Threonine_C4H7NO2 | 101.047679  |
| C5H11N1O1         | 101.084064  |
| C4H6O1S1          | 102.013937  |
| C5H2O_1N4         | 102.033031  |
| C5H10O2           | 102.068080  |
| C6H14O1           | 102.104465  |
| C6H1N1O1          | 103.005814  |
| C8H9N1O_1         | 103.078584  |
| C6O2              | 103.989830  |
| C3H4O4            | 104.010960  |
| C7H4O1            | 104.026215  |
| C6H4N2            | 104.037448  |
| C4H8O3            | 104.047345  |
| C8H8              | 104.062600  |
| C6H3N1O1          | 105.021464  |
| C3H7N1O1S1        | 105.024836  |
| C6H5N2            | 105.045273  |
| C4H11N1O2         | 105.078979  |
| C3H6O4            | 106.026640  |
| C6H4O1N1          | 106.029289  |
| C2H5O2N1S1        | 107.004101  |
| C2H6N1O2P1        | 107.013617  |

| <b>Name</b>           | <b>Mass</b> |
|-----------------------|-------------|
| C6H5N1O1              | 107.037114  |
| C7H9N1                | 107.073499  |
| C1H1O4P1              | 107.961248  |
| C6H4O2                | 108.021130  |
| C3H8O4                | 108.042293  |
| C7H8O1                | 108.057515  |
| C8H12                 | 108.093900  |
| C5H3O2N1              | 109.016379  |
| C2H7O2N1S1            | 109.019751  |
| C6H7O1N1              | 109.052764  |
| C5H2O3                | 110.000454  |
| cytosine_(H)_C4H4N3O  | 110.035437  |
| C6H6O2                | 110.036780  |
| C5H6O1N2              | 110.048013  |
| C7H10O1               | 110.073165  |
| C13H16O2P_2S_1        | 110.195432  |
| C1H1N_1O3S2           | 110.933640  |
| C3H1N3O2              | 111.006877  |
| uracil_(H)_C4H3N2O2   | 111.019453  |
| C6H5Cl1               | 112.008000  |
| C5H4O3                | 112.016045  |
| C4H4N2O2              | 112.027278  |
| C6H8O2                | 112.052473  |
| C5H12N4O_1            | 112.111281  |
| C8H16                 | 112.125200  |
| H1S2O3                | 112.936714  |
| C1H4N_1O5P1           | 112.976564  |
| C5H7N1O2              | 113.047679  |
| Isoleucine_C6H11NO    | 113.084064  |
| C4H2O4                | 113.995310  |
| C4H3F1N2O1            | 114.022941  |
| C5H6O3                | 114.031695  |
| Asparagine_C4H6N2O2   | 114.042928  |
| C6H10O2               | 114.068080  |
| C5H10N2O1             | 114.079313  |
| Aspartic_Acid_C4H5NO3 | 115.026944  |
| C5H7O3                | 115.039520  |
| C8H5N1                | 115.042199  |
| C5H9N1O2              | 115.063329  |
| C4H4O4                | 116.010960  |
| C3H4N2O3              | 116.022193  |
| C5H8O1S1              | 116.029587  |
| C5H8O3                | 116.047345  |
| C8H8O_1N2             | 116.073833  |
| C5H12O1N2             | 116.094963  |
| C4H7N1O1S1            | 117.024836  |
| C4H7O3N1              | 117.042594  |
| C5H3N5O_1             | 117.043930  |
| C8H7N1                | 117.057849  |
| C3H2O5                | 117.990225  |
| C4H6O4                | 118.026610  |
| C5H2N4                | 118.027946  |

| <b>Name</b>                  | <b>Mass</b> |
|------------------------------|-------------|
| <b>C8H6O1</b>                | 118.041865  |
| <b>C9H10</b>                 | 118.078250  |
| <b>C3H5N1O2S1</b>            | 119.004101  |
| <b>C7H5N1O1</b>              | 119.037114  |
| <b>C6H5N3</b>                | 119.048347  |
| <b>C5H5N5O_1</b>             | 119.059580  |
| <b>C7H4O2</b>                | 120.021130  |
| <b>C6H4N2O1</b>              | 120.032363  |
| <b>C3H8O1N2S1</b>            | 120.035735  |
| <b>C4H8O4</b>                | 120.042334  |
| <b>C8H8O1</b>                | 120.057515  |
| <b>C6H3N1O2</b>              | 121.016379  |
| <b>C3H7N1O2S1</b>            | 121.019751  |
| <b>C8H11N1</b>               | 121.089149  |
| <b>C2H2O4S1</b>              | 121.967382  |
| <b>C7H6O2</b>                | 122.036780  |
| <b>C6H8N3</b>                | 122.071822  |
| <b>C8H10O1</b>               | 122.073165  |
| <b>C5H1N1O3</b>              | 122.995644  |
| <b>C2H6N1O3P1</b>            | 123.008532  |
| <b>C6H7N2O1</b>              | 123.055838  |
| <b>C8H13N1</b>               | 123.104799  |
| <b>H1C1O5P1</b>              | 123.956163  |
| <b>C2H4O2S2</b>              | 123.965274  |
| <b>C2H5O4P1</b>              | 123.992548  |
| <b>C6H4O3</b>                | 124.016172  |
| <b>C6H6N1O2</b>              | 124.039854  |
| <b>C2H3N_1O3S2</b>           | 124.949290  |
| <b>C4H3N3O2</b>              | 125.022527  |
| <b>thymine_(H)_C5H5N2O2</b>  | 125.035103  |
| <b>C7H7Cl1</b>               | 126.023700  |
| <b>C6H6O3</b>                | 126.031695  |
| <b>C6H8N1S1</b>              | 126.037746  |
| <b>C5H6N2O2</b>              | 126.042928  |
| <b>C6H10N2O1</b>             | 126.079313  |
| <b>C5H10N4</b>               | 126.090546  |
| <b>C8H14O1</b>               | 126.104465  |
| <b>C5H5O3N1</b>              | 127.026944  |
| <b>C6H9O2N1</b>              | 127.063329  |
| <b>C7H17N3O_1</b>            | 127.147332  |
| <b>C5H4O4</b>                | 128.010960  |
| <b>C6H8O3</b>                | 128.047345  |
| <b>Glutamine_C5H8N2O2</b>    | 128.058578  |
| <b>Lysine_C6H12N2O</b>       | 128.094963  |
| <b>Glutamic_Acid_C5H7NO3</b> | 129.042594  |
| <b>C6H11N1O2</b>             | 129.078979  |
| <b>C7H19N3O_1</b>            | 129.162982  |
| <b>C2H_6O7</b>               | 129.917455  |
| <b>C5H3Cl1O2</b>             | 129.982200  |
| <b>C5H6O4</b>                | 130.026610  |
| <b>C9H6O1</b>                | 130.041865  |
| <b>C6H10O3</b>               | 130.062995  |

| <b>Name</b>               | <b>Mass</b> |
|---------------------------|-------------|
| <b>C10H10</b>             | 130.078250  |
| <b>C6H14O1N2</b>          | 130.110613  |
| <b>C7H16N1O1</b>          | 130.123189  |
| <b>C8H5O1N1</b>           | 131.037114  |
| <b>Methionine_C5H9NOS</b> | 131.040486  |
| <b>C5H9N1O3</b>           | 131.058244  |
| <b>C6H5O_1N5</b>          | 131.059580  |
| <b>C4H4O5</b>             | 132.005875  |
| <b>C8H4O2</b>             | 132.021130  |
| <b>pentose_C5H8O4</b>     | 132.042260  |
| <b>C9H8O1</b>             | 132.057515  |
| <b>C8H8N2</b>             | 132.068748  |
| <b>C10H12</b>             | 132.093900  |
| <b>C7H3N1O2</b>           | 133.016379  |
| <b>C4H7N1O2S1</b>         | 133.019751  |
| <b>C5H3N5</b>             | 133.038845  |
| <b>C5H9O4</b>             | 133.050085  |
| <b>C8H7N1O1</b>           | 133.052764  |
| <b>H7O6P1</b>             | 133.998028  |
| <b>C5H2O1N4</b>           | 134.022861  |
| <b>C8H6O2</b>             | 134.036780  |
| <b>adenine_(H)_C5H4N5</b> | 134.046670  |
| <b>C4H10O1N2S1</b>        | 134.051385  |
| <b>C5H10O4</b>            | 134.057910  |
| <b>C8H8N1O1</b>           | 134.060589  |
| <b>C7H5N1O2</b>           | 135.032029  |
| <b>C4H9N1O2S1</b>         | 135.035401  |
| <b>C8H9N1O1</b>           | 135.068414  |
| <b>C2O7</b>               | 135.964405  |
| <b>C4H9O3P1</b>           | 136.028933  |
| <b>C4H8O5</b>             | 136.037175  |
| <b>C5H4O1N4</b>           | 136.038511  |
| <b>C8H8O2</b>             | 136.052430  |
| <b>C9H12O1</b>            | 136.088815  |
| <b>C10H16</b>             | 136.125200  |
| <b>C3H8N1O3P1</b>         | 137.024182  |
| <b>C7H7N1O2</b>           | 137.047679  |
| <b>Histidine_C6H7N3O</b>  | 137.058912  |
| <b>C7H6O3</b>             | 138.031695  |
| <b>C6H6N2O2</b>           | 138.042928  |
| <b>C9H14O1</b>            | 138.104465  |
| <b>C2H4O3S2</b>           | 139.960189  |
| <b>C6H4O4</b>             | 140.010960  |
| <b>C7H8O3</b>             | 140.047488  |
| <b>C8H14N1O1</b>          | 140.107539  |
| <b>C2H8O4N1P1</b>         | 141.019097  |
| <b>C8H15N1O1</b>          | 141.115364  |
| <b>C8H19N3O_1</b>         | 141.162982  |
| <b>O5P2</b>               | 141.922101  |
| <b>C1H3O6P1</b>           | 141.966728  |
| <b>C2H6O3S2</b>           | 141.975839  |
| <b>C10H6O1</b>            | 142.041865  |



| <b>Name</b>         | <b>Mass</b> |
|---------------------|-------------|
| C7H10O3             | 142.062995  |
| C6H10N2O2           | 142.074228  |
| C11H10              | 142.078250  |
| C10H10N2O_1         | 142.089483  |
| C6H9N1O3            | 143.058244  |
| C10H9N1             | 143.073499  |
| C7H13N1O2           | 143.094629  |
| C3H1N2O3P1          | 143.972481  |
| C6H8O4              | 144.042260  |
| C5H8N2O3            | 144.053493  |
| C10H8O1             | 144.057515  |
| C7H12O1S1           | 144.060887  |
| C7H12O3             | 144.078645  |
| C5H7N1O4            | 145.037509  |
| C6H4Cl2             | 145.969000  |
| C9H6O2              | 146.036780  |
| C6H10O4             | 146.057910  |
| C10H10O1            | 146.073165  |
| C7H1N1O3            | 146.995644  |
| C8H5N1O2            | 147.032029  |
| C8H4O3              | 148.016045  |
| C5O5H8              | 148.037175  |
| C9H8O2              | 148.052430  |
| C6H12O4             | 148.073560  |
| C10H12O1            | 148.088815  |
| C6H5O1N4            | 149.046336  |
| C8H7N1O2            | 149.047679  |
| C9H11N1O1           | 149.084064  |
| C5H2N4S1            | 150.000018  |
| C8H6O3              | 150.031695  |
| guanine_(H)_C5H4N5O | 150.041585  |
| C5H10O5             | 150.052825  |
| C6H6O1N4            | 150.054161  |
| C9H10O2             | 150.068080  |
| C5H13N1O2P1         | 150.068392  |
| C10H14O1            | 150.104465  |
| C3H6N1O4P1          | 151.003447  |
| C7H5N1O3            | 151.026944  |
| C7H9N3O1            | 151.074562  |
| C3H5O5P1            | 151.987463  |
| C4H9O2P1S1          | 152.006090  |
| C3H8O1N2S2          | 152.007807  |
| C7H4O4              | 152.010960  |
| C8H8O3              | 152.047345  |
| C6H8N4O1            | 152.069811  |
| C10H16O1            | 152.120115  |
| C3H6O5S1            | 153.993597  |
| C3H7O5P1            | 154.003113  |
| C11H6O1             | 154.041865  |
| C10H18O1            | 154.135765  |
| C8H13O2N1           | 155.094629  |
| C7H8O4              | 156.042260  |

| Name               | Mass       |
|--------------------|------------|
| C6H7N1O4           | 157.037509 |
| C10H7N1O1          | 157.052764 |
| C7H11O3N1          | 157.073894 |
| C6H11N3O2          | 157.085127 |
| C8H15N1O2          | 157.110279 |
| O6P2               | 157.917016 |
| C6H6O5             | 158.021525 |
| C10H6O2            | 158.036780 |
| C7H10O4            | 158.057910 |
| C10H10N2           | 158.084398 |
| C6H14O1N4          | 158.116761 |
| H3N1O5P2           | 158.948650 |
| C6H9N1O4           | 159.053159 |
| H2O6P2             | 159.932666 |
| C5H8N2O2S1         | 160.030650 |
| C6H8O5             | 160.037175 |
| C7H12O4            | 160.073560 |
| N3O2C6H14          | 160.108602 |
| C13H20O_1          | 160.161585 |
| H1O7P2N_1          | 160.916682 |
| diphosphate_H3O6P2 | 160.940491 |
| C6H11N1O4          | 161.068809 |
| H4O6P2             | 161.948316 |
| C9H6O3             | 162.031695 |
| C6H10O3S1          | 162.035067 |
| C10H10O2           | 162.068080 |
| C5H10O3N1P1        | 163.039832 |
| C6H11O5            | 163.060650 |
| Tyrosine_C9H9NO2   | 163.063329 |
| C10H13N1O1         | 163.099714 |
| C5H12N2S2          | 164.044192 |
| C6H12O5            | 164.068475 |
| C7H8O1N4           | 164.069811 |
| C10H12O2           | 164.083730 |
| C12H20             | 164.156500 |
| C3H8N3O3P1         | 165.030330 |
| C5H12N1O3P1        | 165.055482 |
| C9H11N1O2          | 165.078979 |
| C8H10N2S1          | 166.056470 |
| C9H10O3            | 166.062995 |
| C5H13N1O3P1        | 166.063307 |
| C10H14O2           | 166.099380 |
| C9H13N1O2          | 167.094629 |
| C6H3N1O3S1         | 168.983366 |
| C4H10O5P1          | 169.026588 |
| C1O6P2             | 169.917016 |
| C3H7O6P1           | 169.998028 |
| C6H10O_1C11N5      | 171.067600 |
| C10H8N2O1          | 172.063663 |
| C7H12N2O3          | 172.084793 |
| C9H16O3            | 172.109945 |
| C8H15N1O3          | 173.105194 |

| <b>Name</b>     | <b>Mass</b> |
|-----------------|-------------|
| C6H6O6          | 174.016440  |
| C7H10O5         | 174.052825  |
| C8H14O4         | 174.089210  |
| C6H14O2N4       | 174.111676  |
| C9H5N1O3        | 175.026944  |
| C7H13N1O4       | 175.084459  |
| H2O7P2          | 175.927581  |
| C4O8            | 175.959320  |
| C6H8O6          | 176.032090  |
| C10H8O3         | 176.047345  |
| C7H12O5         | 176.068475  |
| C9H7N1O3        | 177.042594  |
| C7H7N5O1        | 177.065060  |
| H4O7P2          | 177.943231  |
| C9H9N1O3        | 179.058244  |
| C6H3Cl3         | 179.930000  |
| glucose_C6H12O6 | 180.063390  |
| C10H12O3        | 180.078645  |
| C10H15O2N1      | 181.110279  |
| C5H12Cl1O1N2P1  | 182.037600  |
| C8H10O1N2S1     | 182.051385  |
| C13H10O1        | 182.073165  |
| C10H14O3        | 182.094295  |
| C12H22O1        | 182.167065  |
| C7H9O3N3        | 183.064392  |
| C8H13N3O2       | 183.100777  |
| C7H4O4S1        | 183.983032  |
| C7H4O6          | 184.000790  |
| C4H9O6P1        | 184.013678  |
| C8H12N2O3       | 184.084793  |
| C10H24N4O_1     | 184.205181  |
| C10H11O_1N5     | 185.106530  |
| C11H6O3         | 186.031695  |
| C8H14N2O3       | 186.100443  |
| C8H13N1O4       | 187.084459  |
| C7H13N3O3       | 187.095692  |
| C8H12O1S2       | 188.032959  |
| C11H8O3         | 188.047345  |
| C12H12O2        | 188.083730  |
| C10H7N1O3       | 189.042594  |
| C10H10O2N2      | 190.074228  |
| C14H22          | 190.172150  |
| C10H8O4         | 192.042260  |
| C7H12O6         | 192.063390  |
| C11H12O3        | 192.078645  |
| C12H16O2        | 192.115030  |
| C7H3N3O4        | 193.012357  |
| C9H7N1O4        | 193.037509  |
| C9H11O2N3       | 193.085127  |
| C5H7O4P1S1      | 193.980270  |
| C9H6O5          | 194.021525  |
| C9H8N1O4        | 194.045334  |

| <b>Name</b>      | <b>Mass</b> |
|------------------|-------------|
| C11H18N2O1       | 194.141913  |
| C15H30O_1        | 194.239835  |
| C9H9N1O4         | 195.053159  |
| C7H9O2N5         | 195.075625  |
| C9H13O2N3        | 195.100777  |
| C6H12O7          | 196.058305  |
| C8H10N2O2S1      | 198.046300  |
| C8H13N3O3        | 199.095692  |
| C3H6O6P2         | 199.963966  |
| C4H9O7P1         | 200.008593  |
| C12H8O3          | 200.047345  |
| C12H24O2         | 200.177630  |
| C9H15N1O4        | 201.100109  |
| C10H11N5         | 201.101445  |
| C8H14N2O2S1      | 202.077600  |
| C8H14N2O4        | 202.095358  |
| C10H18O4         | 202.120510  |
| C11H9N1O3        | 203.058244  |
| glcnac_C8H13N1O5 | 203.079374  |
| C10H13N5         | 203.117095  |
| C10H4O5          | 204.005875  |
| C11H8O4          | 204.042260  |
| C15H24           | 204.187800  |
| C10H11N3S1       | 205.067369  |
| C9H11O1N5        | 205.096360  |
| C1H4O8P2         | 205.938146  |
| C6H6O8           | 206.006270  |
| C11H10O4         | 206.057910  |
| C10H10O3N2       | 206.069143  |
| C8H14O6          | 206.079040  |
| C14H8O2          | 208.052430  |
| C6H11O6P1        | 210.029328  |
| C14H26O1         | 210.198365  |
| C5H10N1O6P1      | 211.024577  |
| C5H9O7P1         | 212.008593  |
| C12H20O3         | 212.141245  |
| C5H10O7P1        | 213.016418  |
| C13H10O3         | 214.062995  |
| C12H10N2O2       | 214.074228  |
| C12H8S2          | 216.006744  |
| C11H4Cl1N1O2     | 216.993000  |
| C8H11N1O6        | 217.058639  |
| C6H3I1O1         | 217.922800  |
| C6H7N2O5P1       | 218.009261  |
| C12H10O4         | 218.057910  |
| C15H22O1         | 218.167065  |
| C12H11O4         | 219.065735  |
| C4H11O2Cl2N2P1   | 219.993500  |
| C8H12O7          | 220.058305  |
| C13H16O3         | 220.109945  |
| C14H20O2         | 220.146330  |
| C16H28           | 220.219100  |

| <b>Name</b>  | <b>Mass</b> |
|--------------|-------------|
| C8H15O6N1    | 221.089939  |
| C15H26O1     | 222.198365  |
| C17H34O_1    | 222.271135  |
| C12H17O3N1   | 223.120844  |
| C3H2N2O6P2   | 223.938814  |
| C12H8N4O1    | 224.069811  |
| C12H16O4     | 224.104860  |
| C15H28O1     | 224.214015  |
| C6H10O7S1    | 226.014727  |
| C14H26O2     | 226.193280  |
| C18H26O_1    | 226.208535  |
| C10H16N2O4   | 228.111008  |
| C19H32O_2    | 228.260570  |
| C5H11O8P1    | 230.019158  |
| C8H10N2O6    | 230.053888  |
| C9H14N2O5    | 230.090273  |
| C8H12N2O4S1  | 232.051780  |
| C19H36O_2    | 232.291870  |
| C15H22O2     | 234.161980  |
| C19H38O_2    | 234.307520  |
| C6H10O5P1N3  | 235.035810  |
| C8H12O8      | 236.053220  |
| C19H26O_1    | 238.208535  |
| C6H10N1O7P1  | 239.019492  |
| H3O9P3       | 239.898999  |
| C11H12O6     | 240.063390  |
| C18H24       | 240.187800  |
| C16H32O1     | 240.245315  |
| C6H12O7N1P1  | 241.035142  |
| C6H11O8P1    | 242.019158  |
| C11H18N2O4   | 242.126658  |
| C18H26       | 242.203450  |
| C12H20O5     | 244.131075  |
| C10H15O6N1   | 245.089939  |
| C9H14N2O4S1  | 246.067430  |
| C15H18O3     | 246.125595  |
| C8H12N2O5S1  | 248.046695  |
| C16H24O2     | 248.177630  |
| C7H8N1O5P1S1 | 248.986084  |
| C7H12O5N3P1  | 249.051460  |
| C9H15N1O5S1  | 249.067096  |
| C10H12N5O3   | 250.094015  |
| C15H8O4      | 252.042260  |
| C17H16O2     | 252.115030  |
| C15H24O3     | 252.172545  |
| C20H28O_1    | 252.224185  |
| C13H6N2O4    | 254.032758  |
| C10H10O4N2S1 | 254.036130  |
| C18H22O1     | 254.167065  |
| C16H17O2N1   | 255.125929  |
| C18H24O1     | 256.182715  |
| C7H8N5O4P1   | 257.031393  |

| Name              | Mass       |
|-------------------|------------|
| H5O10P3           | 257.909564 |
| C10H14N2O6        | 258.085188 |
| C13H14O2N4        | 258.111676 |
| C7H4Cl4O2         | 259.896500 |
| C13H16N4O2        | 260.127326 |
| C16H20O3          | 260.141245 |
| C18H28O1          | 260.214015 |
| C9H15N2O5P1       | 262.071861 |
| C18H30O1          | 262.229665 |
| C11H8N2O4S1       | 264.020480 |
| C10H16O8          | 264.084520 |
| C18H32O1          | 264.245315 |
| C_8H_6N7O9P3S1    | 264.822164 |
| C18H34O1          | 266.260965 |
| C_10H_12N7O11P3S1 | 266.765044 |
| C16H13N1O3        | 267.089544 |
| C17H17O2N1        | 267.125929 |
| C10H8O3N2S2       | 267.997637 |
| C7H13O7N2P1       | 268.046041 |
| C20H12O1          | 268.088815 |
| C20H28            | 268.219100 |
| C17H19O2N1        | 269.141579 |
| C19H10O2          | 270.068080 |
| C19H26O1          | 270.198365 |
| C10H10F1N3O5      | 271.060450 |
| C10H16Cl_1O6N3S1  | 271.107100 |
| C19H28O1          | 272.214015 |
| C20H32            | 272.250400 |
| C14H10O2S2        | 274.012224 |
| C11H17N1O7        | 275.100504 |
| C14H15O5N1        | 277.095024 |
| C5H12O9P2         | 277.995661 |
| C14H14O6          | 278.079040 |
| C20H38            | 278.297350 |
| C11H13N5O2S1      | 279.078997 |
| C18H14N1F1O1      | 279.105942 |
| C_9H_10N7O11P3S1  | 280.780694 |
| C9H16N1O7P1       | 281.066442 |
| C18H19O2N1        | 281.141579 |
| C_8H_4N7O10P3S1   | 282.832729 |
| C8H14N1O8P1       | 283.045707 |
| C17H17N1O3        | 283.120844 |
| C2H7O10P3         | 283.925214 |
| C15H8O6           | 284.032090 |
| C16H12O5          | 284.068475 |
| C20H28O1          | 284.214015 |
| C_10H_10N7O12P3S1 | 284.775609 |
| C11H14N2O7        | 286.080103 |
| C20H30O1          | 286.229665 |
| C21H34            | 286.266050 |
| C17H21O3N1        | 287.152144 |
| C18H8O4           | 288.042260 |

| Name             | Mass       |
|------------------|------------|
| C20H32O1         | 288.245315 |
| C20H34O1         | 290.260965 |
| C11H17N1O8       | 291.095419 |
| C5H10O10P2       | 291.974926 |
| C6H12O9S2        | 291.992279 |
| C12H20O8         | 292.115820 |
| C20H36O1         | 292.276615 |
| C5H_6O15         | 293.876775 |
| C11H18O9         | 294.095085 |
| C19H22O1N2       | 294.173213 |
| C20H38O1         | 294.292265 |
| C_8H_8N7O11P3S1  | 294.796344 |
| C14H12N6O2       | 296.102174 |
| C11H15N5O3S1     | 297.089562 |
| C18H19N1O3       | 297.136494 |
| C_9H_8N7O12P3S1  | 298.791259 |
| C19H25N1O2       | 299.188529 |
| C17H18O5         | 302.115425 |
| C9H11N3O7P1      | 304.033465 |
| C15H12O7         | 304.058305 |
| C10H16N4O5S1     | 304.084143 |
| C9H12N3O7P1      | 305.041290 |
| C10H15N3O6S1     | 305.068159 |
| C11H20O5N3P1     | 305.114060 |
| C12H23O6N3       | 305.158687 |
| C18H10O5         | 306.052825 |
| C10H17N3O6S1     | 307.083809 |
| neugc_C11H17N1O9 | 307.090318 |
| C18H12O5         | 308.068475 |
| C10H17N2O7P1     | 308.077341 |
| C15H16O7         | 308.089605 |
| C12H20O9         | 308.110735 |
| C20H24O1N2       | 308.188863 |
| C19H20N1O3       | 310.144319 |
| C22H30O1         | 310.229665 |
| C19H21O3N1       | 311.152144 |
| C8H13N2O9P1      | 312.035871 |
| C22H32O1         | 312.245315 |
| C_8H_6N7O12P3S1  | 312.806909 |
| C16H10O7         | 314.042655 |
| C22H34O1         | 314.260965 |
| C12H12O10        | 316.043050 |
| C11H14N2O7P1     | 317.053866 |
| C11H13N1O8P1     | 318.037882 |
| C20H18O2N2       | 318.136828 |
| C20H30O3         | 318.219495 |
| C21H34O2         | 318.255880 |
| C22H38O1         | 318.292265 |
| C9H13O7N4P1      | 320.052189 |
| C22H40O1         | 320.307915 |
| C6H11O10N1S2     | 320.982443 |
| C9H12N3O8P1      | 321.036205 |

| <b>Name</b>    | <b>Mass</b> |
|----------------|-------------|
| C22H42O1       | 322.323565  |
| C9H14N3O8P1    | 323.051855  |
| C12H21N1O9     | 323.121634  |
| C20H21N1O3     | 323.152144  |
| C18H12O6       | 324.063390  |
| C15H16O8       | 324.084520  |
| C12H22O6P2     | 324.089166  |
| C12H20O10      | 324.105650  |
| C17H12O7       | 328.058305  |
| C10H13N6O5P1   | 328.068507  |
| C10H12N5O6P1   | 329.052523  |
| C10H11N4O7P1   | 330.036539  |
| C10H13N5O6P1   | 330.060348  |
| C21H20O2N2     | 332.152478  |
| C11H14N2O6S2   | 334.029332  |
| C9H14O7N5P1    | 335.063088  |
| C21H24N2O2     | 336.183778  |
| C9H15N4O4P2S1  | 337.028929  |
| C9H15O8N4P1    | 338.062754  |
| C9H14N3O9P1    | 339.046770  |
| C15H17N1O8     | 339.095419  |
| C18H12O7       | 340.058305  |
| C11H21N2O6P1S1 | 340.085798  |
| C25H40         | 340.313000  |
| C11H20O7S1N1P1 | 341.069814  |
| C18H14O7       | 342.073955  |
| C6H2I2O1       | 343.819500  |
| C27H36O_1      | 344.286785  |
| C6H4I2O1       | 345.835200  |
| C12H10O12      | 346.017230  |
| C10H11N4O8P1   | 346.031454  |
| C10H14N5O7P1   | 347.063088  |
| C12H17N3O7S1   | 347.078724  |
| C16H28O8       | 348.178420  |
| C24H44O1       | 348.339215  |
| C3H13O11P3S1   | 349.939151  |
| C21H22O3N2     | 350.163043  |
| C25H34O1       | 350.260965  |
| C24H46O1       | 350.354865  |
| C12H16O12      | 352.064180  |
| C21H23O4N1     | 353.162709  |
| C18H14N2O6     | 354.085188  |
| C14H17O6N3S1   | 355.083809  |
| C18H30O7       | 358.199155  |
| C14H20N2O9     | 360.116883  |
| C24H40O2       | 360.302830  |
| C14H23O10N1    | 365.132199  |
| C27H44         | 368.344300  |
| C17H22O9       | 370.126385  |
| C5H11O13P3     | 371.941259  |
| C11H12N5O8P1   | 373.042353  |
| C22H18N2O4     | 374.126658  |



| <b>Name</b>     | <b>Mass</b> |
|-----------------|-------------|
| C24H38O3        | 374.282095  |
| C20H7O1Cl2N3    | 374.996600  |
| C11H19O5N4P2S1  | 381.055144  |
| C27H44O1        | 384.339215  |
| C10H15N3O6S2e1  | 384.984700  |
| C9H12N2O11P2    | 385.991639  |
| C24H38O4        | 390.277010  |
| C27H40O2        | 396.302830  |
| C30H40          | 400.313000  |
| C10H16O11N2P2   | 402.022939  |
| C30H48          | 408.375600  |
| C10H14N5O9P3S_1 | 409.028372  |
| C18H24O11       | 416.131865  |
| C24H32O6        | 416.219890  |
| C17H32N6O4S1    | 416.220576  |
| C27H44O3        | 416.329045  |
| C11H22N2O9P2S1  | 420.052131  |
| C23H35N1O4S1    | 421.228681  |
| C12H19O7N4P2S1  | 425.044974  |
| C19H19O5N7      | 425.144768  |
| C19H21N7O5      | 427.160418  |
| C18H34N6O4S1    | 430.236226  |
| C27H44O4        | 432.323960  |
| C3H2N7O11P3S1   | 436.874594  |
| C17H19N4O8P1    | 438.094054  |
| C27H18O6        | 438.110340  |
| C46H77N_2O_8P_1 | 442.663294  |
| C35H46O_1       | 450.365035  |
| C7H12O12N5P3    | 450.969539  |
| C30H44O3        | 452.329045  |
| C22H27O4N7      | 453.212453  |
| C18H30O13       | 454.168645  |
| C20H21N7O6      | 455.155333  |
| C25H32N2O6      | 456.226038  |
| C1N7O14P3S1     | 458.843689  |
| C9H13N2O14P3    | 465.957972  |
| C18H30O14       | 470.163560  |
| C2H2N7O14P3S1   | 472.859339  |
| C20H39N7O4S1    | 473.278425  |
| C35H56          | 476.438200  |
| C32H60O2        | 476.459330  |
| C9H14N5O12P3    | 476.985189  |
| C25H38N2O5S1    | 478.250145  |
| C4H2N7O13P3S1   | 480.864424  |
| C17H28N2O12S1   | 484.136300  |
| C17H30O12N2S1   | 486.151950  |
| C18H30O15       | 486.158475  |
| C28H30O4N4      | 486.226706  |
| C10H14N5O12P3   | 488.985189  |
| C5H4N7O13P3S1   | 494.880074  |
| C9H16O13N5P3    | 494.995754  |
| C19H20N3O11P1   | 497.083550  |

| <b>Name</b>      | <b>Mass</b> |
|------------------|-------------|
| C4H6N7O14P3S1    | 500.890639  |
| C10H14N5O13P3    | 504.980104  |
| C10H13N4O14P3    | 505.964120  |
| C5H8N7O14P3S1    | 514.906289  |
| C23H21O11N3      | 515.117612  |
| C21H25N1O14      | 515.127509  |
| C15H17N5O10P2S1  | 521.017143  |
| C46H78N_2O_5     | 522.629627  |
| C27H27O10N1      | 525.163499  |
| C18H28O18        | 532.127570  |
| C29H31O9N1       | 537.199884  |
| C15H21N5O13P2    | 541.061116  |
| C15H22N5O13P2    | 542.068941  |
| C40H64           | 544.500800  |
| C28H51N1O9       | 545.356384  |
| C29H31O10N1      | 553.194799  |
| C21H41N5O12      | 555.275175  |
| C7H10N7O15P3S1   | 556.916854  |
| C34H32O4N4       | 560.242356  |
| C27H20N2O12      | 564.101628  |
| S2O9C20H32N6     | 564.167223  |
| C44H72O_2        | 568.573570  |
| C10H15N5O15P4    | 568.951522  |
| C8H12N7O15P3S1   | 570.932504  |
| C14H24N7O10P3S1  | 575.051829  |
| C14H26N7O11P3S1  | 593.062394  |
| C35H32O4M1g1N4   | 596.227400  |
| C23H43O13N5      | 597.285740  |
| C16H28N7O10P3S1  | 603.083129  |
| C14H21N6O13P3S1  | 606.010025  |
| C35H30O5M1g1N4   | 610.206700  |
| C45H72           | 612.563400  |
| C34H63N1O8       | 613.455369  |
| C12H26N7O14P3S1  | 617.047139  |
| C17H30N7O10P3S1  | 617.098779  |
| C16H27N6O12P3S1  | 620.062060  |
| C27H24O17        | 620.101355  |
| C16H26N5O13P3S1  | 621.046076  |
| C15H23N5O16P3    | 622.035274  |
| C13H21N6O15P3S1  | 625.999855  |
| C24H27N4O14P1    | 626.126144  |
| C30H32N2O13      | 628.190443  |
| C16H26N7O12P3S1  | 633.057309  |
| C28H39O13S_2N6P1 | 634.287133  |
| C15H30N7O13P3S1  | 641.083524  |
| C21H26N7O13P2    | 646.106389  |
| C13H28N7O15P3S1  | 647.057704  |
| C17H28N7O12P3S1  | 647.072959  |
| C24H40O20        | 648.211300  |
| C10H16N5O18P5    | 648.917855  |
| C14H22N7O15P3S1  | 653.010754  |
| C15H30N7O14P3S1  | 657.078439  |

| <b>Name</b>     | <b>Mass</b> |
|-----------------|-------------|
| C15H32N7O14P3S1 | 659.094089  |
| C20H29N3O18P2   | 661.092143  |
| C15H24N7O15P3S1 | 667.026404  |
| C21H33N7O12P2S1 | 669.138321  |
| C19H32N7O12P3S1 | 675.104259  |
| C50H80          | 680.626000  |
| C14H20N7O17P3S1 | 682.984934  |
| C28H38N5O13P1   | 683.220378  |
| C16H30N7O15P3S1 | 685.073354  |
| C39H60O10       | 688.418650  |
| C19H31N6O14P3S1 | 692.083190  |
| C34H64N1O11P1   | 693.421702  |
| C43H71O5P1      | 698.503913  |
| C39H60O11       | 704.413565  |
| C19H29N6O15P3S1 | 706.062455  |
| C19H32N7O14P3S1 | 707.094089  |
| C43H87O5P1      | 714.629113  |
| C20H34O14N7P3S1 | 721.109739  |
| C19H29N6O16P3S1 | 722.057370  |
| C34H42O14N4     | 730.269756  |
| C23H34N4O19P2   | 732.129257  |
| C21H36N7O14P3S1 | 735.125389  |
| C39H42O11N4     | 742.285011  |
| C21H34N7O15S1P3 | 749.104654  |
| C21H35N7O15P3S1 | 750.112479  |
| C29H34N5O17P1   | 755.168738  |
| C30H43N6O15P1   | 758.252407  |
| C21H32N7O16P3S1 | 763.083919  |
| C21H36N7O16P3S1 | 767.115219  |
| C29H49O17N3P2   | 773.253728  |
| C22H38N7O16P3S1 | 781.130869  |
| C22H35N8O16P3S1 | 792.110468  |
| C23H37N7O16P3S1 | 792.123044  |
| H39C24O16N7P3S1 | 806.138694  |
| C23H38O17N7P3S1 | 809.125784  |
| C30H50O25       | 810.264125  |
| C24H40O17N7P3S1 | 823.141434  |
| C31H52N7O17P1   | 825.315736  |
| H41C26O16N7P3S1 | 832.154344  |
| C25H41O16N8P3S1 | 834.157418  |
| C27H40O17N7P3S1 | 859.141434  |
| C28H41N5O22P2   | 861.171851  |
| C43H50O15N4     | 862.327271  |
| C45H72O16       | 868.482040  |
| C32H52N7O19P1   | 869.305566  |
| C41H60N12O10    | 880.455538  |
| H49C31O16N7P3S1 | 900.216944  |
| C46H63N10O7o1   | 914.421300  |
| C30H48O18N7P3S1 | 919.198949  |
| C44H48O15o1N4   | 919.244800  |
| C44H49O15o1N4   | 920.252700  |
| C60H98O6N1P1    | 959.713177  |

| <b>Name</b>             | <b>Mass</b> |
|-------------------------|-------------|
| <b>C36H60O30</b>        | 972.316950  |
| <b>C34H53N7O23P2</b>    | 989.266814  |
| <b>C35H53N7O25P2</b>    | 1033.256644 |
| <b>C51H80O22</b>        | 1044.514130 |
| <b>C37H58N8O24P2</b>    | 1060.303928 |
| <b>C38H58N8O26P2</b>    | 1104.293758 |
| <b>C56H75N15O10o1</b>   | 1164.515400 |
| <b>C60H64O28</b>        | 1232.358420 |
| <b>C59H83N16O13P1o1</b> | 1301.539500 |

50

## **References for Supplementary Material**

U.S. Geological Survey: National Hydrography Dataset Plus Version 2 [dataset], 2019.
